# Supplementary material for: Symmetrical non-chelating poly-N-heterocyclic carbenes
Source: Royal Society of Chemistry journal article supplement (doi:10.1039/c4ra12597e), 2014-11-07
Supplement: c4ra12597e1.pdf [file c4ra12597e1.pdf]

Supporting Information

For

**Symmetrical Non-Chelating Poly-*N*-  
Heterocyclic Carbenes**

Ying-Hsuan Chen, Kai-En Peng, Gene-Hsiang Lee, Shie-Ming  
Peng, Ching-Wen Chiu\*

*Department of Chemistry, National Taiwan University, No. 1, Sec. 4,  
Roosevelt Rd., Taipei, Taiwan, 10617.*

**General information:**

Air and moisture sensitive reactions were carried out under an atmosphere of N<sub>2</sub> using standard Schlenk techniques or inside the glovebox. Dichloromethane was dried via passing through the molecular sieves packed drying column under nitrogen. THF was dried using Na/K alloy, and distilled under inert atmosphere. 1,3,5-tri (4-aminophenyl) benzene<sup>1</sup> and tetra-(4-aminophenyl) methane<sup>2</sup> were synthesized according to published procedures. <sup>1</sup>H and <sup>13</sup>C NMR spectra were recorded using Bruker Avance III 400 MHz NMR and Bruker AVIII 500MHz FT-NMR. The <sup>1</sup>H and <sup>13</sup>C NMR spectra reported in ppm (δ) are relative to the chemical shift of solvent residual signals for CDCl<sub>3</sub> at 7.26 and 77.00 ppm, DMSO-d<sub>6</sub> at 2.50 and 39.52 ppm, The elemental analysis was recorded on Thermo Flash 2000. The ESI MASS was recorded on Bruker micrOTOF-QII.

**X-ray Crystallography:**

Diffraction data of [2a][I]<sub>2</sub> and [2a-(NiCpI)<sub>2</sub>] were collected at T = 150(2) K with a NONIUS KappaCCD diffractometer and [5][I] was collected at T = 150(2) K with a BRUKER SMART APEXCCD area detector diffractometer. Both of the diffractometers were equipped with a rotation anode using graphite-monochromated Mo-Kα radiation (λ = 0.71073 Å). Diffraction data were collected over the full sphere and were corrected for absorption. Cell parameters were retrieved and refined using DENZO-SMN for [2a][I]<sub>2</sub> and [2a-(NiCpI)<sub>2</sub>] and Bruker SAINT software for [5][I] on all reflections. Data reduction was performed with DENZO-SMN ([2a][I]<sub>2</sub> and [2a-(NiCpI)<sub>2</sub>]) and Bruker SAINT software ([5][I]). Structural analysis was conducted using the SHELXTL program on a personal computer. All the structures were solved and refined using the SHELXL-97 program by full-matrix least-squares on F<sup>2</sup> values. Hydrogen atoms were added to the structure models in calculated positions. Crystallographic data have been deposited at the Cambridge Crystallographic Data Center with deposition number CCDC-1020160, CCDC-1020161, and CCDC-1020162, for [2a][I]<sub>2</sub>, [2a-(NiCpI)<sub>2</sub>], and [5][I], respectively. These data can be obtained free of charge from The Cambridge Crystallographic Data Centre via [www.ccdc.cam.ac.uk/data\\_request/cif](http://www.ccdc.cam.ac.uk/data_request/cif).

## Syntheses:

### *N*-alkyl-benzimidazole-5,6-dicarboxylic anhydride (1).

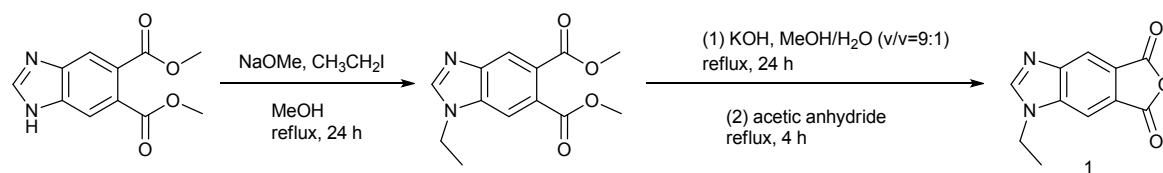

Sodium (0.35 g, 15.3 mmol) was dissolved in 85 mL anhydrous MeOH under nitrogen atmosphere in iced bath. Dimethyl 5,6-benzimidazolidedicarboxylate<sup>3</sup> (3 g, 12.8 mmol) was added into the solution, and the reaction mixture was allowed to stir for 30 min at room temperature. Ethyl iodide 4 mL (8 g, 51.2 mmol) was then added to give a light yellow solution. The mixture was stirred at room temperature for 18 h, and then refluxed for another 5 h. The light yellow solution was concentrated under reduced pressure to give light yellow oil. After purification with silica gel column chromatography (MeOH/CH<sub>2</sub>Cl<sub>2</sub> = 3:97), dimethyl *N*-ethyl-5,6-benzimidazolate was obtained as pale yellow solid (2.53 g, yield 73%). The *N*-ethyl derivative (3 g, 12.1 mmol) was then dissolved in a mixture of 100 mL MeOH/H<sub>2</sub>O (v/v = 9:1), and then KOH (2.04 g, 36.3 mmol) was added. After addition, the light yellow solution was refluxed for 18 h. After cooling to room temperature and concentrated under reduced pressure, the resulting yellow oil was acidified with 5 mL 12 M HCl aqueous solution. The whole mixture was brought to dryness under vacuum, and then was mixed with 20 mL of acetic anhydride. After refluxing for 3 h, the resulting heterogeneous solution was filtered while the solution was warm. The collected filtrate was mixed with 30 mL of diethyl ether to yield light yellow precipitates. The solid was collected by filtration and washed with diethyl ether (10 mL x 2) to give compound **1** as light yellow solid (2.23 g, yield 91%). <sup>1</sup>H NMR (DMSO-*d*<sup>6</sup>, 400 MHz): δ 8.76 (s, 1H, CH), 8.50 (s, 1H, Ar-H), 8.31 (s, 1H, Ar-H), 4.47 (q, *J* = 7.3 Hz, 2H, NCH<sub>2</sub>), 1.45 (t, *J* = 7.3 Hz, 3H, NCH<sub>2</sub>CH<sub>3</sub>) ppm. <sup>13</sup>C NMR (*d*<sup>6</sup>-DMSO, 100 MHz): δ 163.7, 149.5, 148.4, 138.6, 124.6, 124.1, 227.4, 109.5, 40.1, 15.3 ppm. HRMS (ESI-TOF) calcd for C<sub>11</sub>H<sub>9</sub>N<sub>2</sub>O<sub>3</sub> [M+H]<sup>+</sup> 217.0608, found: 217.0605.

## General Synthetic Procedure for Poly-benzimidazolium salts.

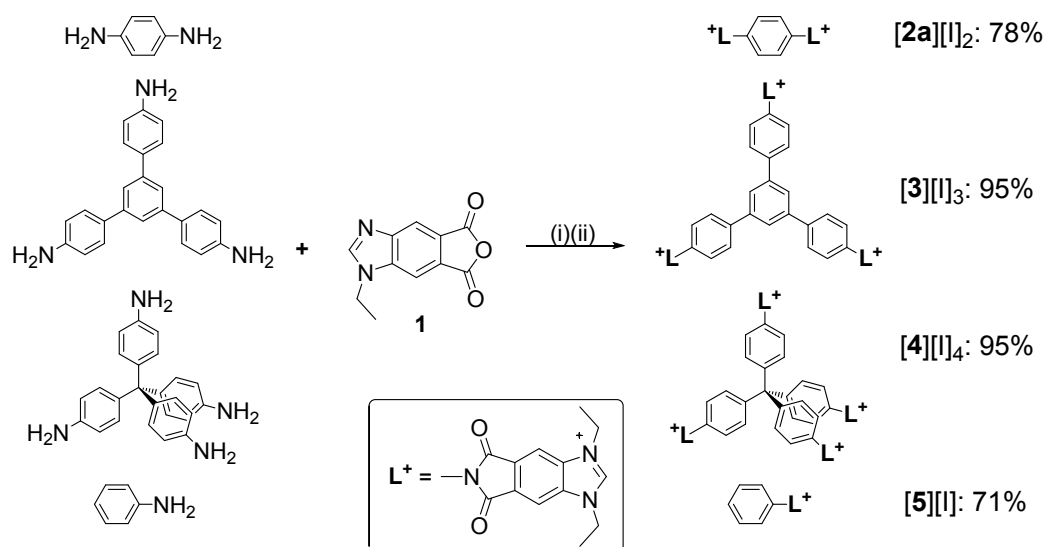

Compound **1** (208 mg for **[2a]**I<sub>2</sub>, 312 mg for **[3]**I<sub>3</sub>, 416 mg for **[4]**I<sub>4</sub>, and 104 mg for **[5]**I<sub>1</sub>) and 0.4 mmol of polyamine were dissolved in 20 mL of CH<sub>3</sub>CN/DMF (v/v = 1:1). The solution was refluxed for 18 h to yield pale yellow precipitates. The precipitates were collected and refluxed in 30 mL DMF in the presence of ethyl iodide (1.28 mL for **[2a]**I<sub>2</sub>, 1.92 mL for **[3]**I<sub>3</sub>, 2.56 mL for **[4]**I<sub>4</sub>, and 0.64 mL for **[5]**I<sub>1</sub>). After refluxing for 18 h, the mixture turned from opaque to clear yellow solution. The solution was then cooled to room temperature, and mixed with 30 mL of diethyl ether to yield yellow precipitates. The solid was collected and washed with diethyl ether (5 mL x 2) to give product as yellow solid.

**[2a]**I<sub>2</sub>. Yellow solid (255 mg, yield: 78 %). M.p.: > 290 °C. <sup>1</sup>H NMR (DMSO-*d*<sub>6</sub>, 400 MHz): δ 10.07 (s, 2H, CH), 8.88 (s, 4H, Ar-H), 7.72 (s, 4H, Ar-H), 4.67 (q, *J* = 7.2 Hz, 8H, NCH<sub>2</sub>), 1.59 (t, *J* = 7.2 Hz, 12H, NCH<sub>2</sub>CH<sub>3</sub>) ppm. <sup>13</sup>C NMR (DMSO-*d*<sub>6</sub>, 100 MHz): δ 165.8, 145.5, 134.7, 131.4, 129.3, 127.9, 110.7, 42.9, 14.3 ppm. HRMS (ESI-TOF) calcd for C<sub>32</sub>H<sub>30</sub>N<sub>6</sub>O<sub>4</sub> [M-2I]<sup>2+</sup> 281.1159, found: 281.1148.

**[2b]**I<sub>2</sub>. Yellow solid (39 mg, yield: 12%). M.p.: 167 °C (dec). <sup>1</sup>H NMR (DMSO-*d*<sub>6</sub>, 400 MHz): δ 10.02 (s, 2H, CH), 8.74 (s, 4H, Ar-H), 7.74 (m, 4H, Ar-H), 4.56 (q, *J* = 7.2 Hz, 8H, NCH<sub>2</sub>), 1.52 (t, *J* = 7.2 Hz, 12H, NCH<sub>2</sub>CH<sub>3</sub>) ppm. <sup>13</sup>C NMR (DMSO-*d*<sub>6</sub>, 100 MHz): δ 165.3, 146.2, 135.3, 130.3, 130.1, 129.2, 129.1, 111.3, 43.3, 14.7 ppm. HRMS (ESI-TOF) calcd for C<sub>32</sub>H<sub>30</sub>N<sub>6</sub>O<sub>4</sub>I [M-I]<sup>1+</sup> 689.1368, found: 689.1357; calcd for C<sub>32</sub>H<sub>30</sub>N<sub>6</sub>O<sub>4</sub> [M-2I]<sup>2+</sup> 281.1159, found: 281.1163.

**[3]**I<sub>3</sub>. Yellow solid (536 mg, yield: 95%). M.p.: 250 °C (dec). <sup>1</sup>H NMR (DMSO-*d*<sub>6</sub>, 400 MHz): δ 10.07 (s, 3H, CH), 8.87 (s, 6H, Ar-H), 8.14 (d, *J* = 8.5 Hz, 6H, Ar-H),

8.13 (s, 3H, Ar-H), 7.69 (d,  $J = 8.5$  Hz, 6H, Ar-H), 4.68 (q,  $J = 7.2$  Hz, 12H, NCH<sub>2</sub>), 1.60 (t,  $J = 7.2$  Hz, 18 H, NCH<sub>2</sub>CH<sub>3</sub>) ppm. <sup>13</sup>C NMR (DMSO-*d*<sub>6</sub>, 100 MHz):  $\delta$  166.4, 145.9, 141.5, 140.3, 135.2, 131.9, 129.9, 128.3, 128.2, 125.6, 111.1, 43.4, 14.8 ppm. HRMS (ESI-TOF) calcd for C<sub>63</sub>H<sub>54</sub>N<sub>9</sub>O<sub>6</sub> [M-3I]<sup>3+</sup> 344.1394, found: 344.1394.

[4][I]<sub>4</sub>. Yellow solid (682 mg, yield: 95%). M.p.: 264 °C (dec). <sup>1</sup>H NMR (DMSO-*d*<sub>6</sub>, 400 MHz):  $\delta$  10.05 (s, 4H, CH), 8.84 (s, 8H, Ar-H), 7.57 (m, 16H, Ar-H), 4.66 (q,  $J = 7.2$  Hz, 16H, NCH<sub>2</sub>), 1.58 (t,  $J = 7.2$  Hz, 24H, NCH<sub>2</sub>CH<sub>3</sub>) ppm. <sup>13</sup>C NMR (DMSO-*d*<sub>6</sub>, 100 MHz):  $\delta$  166.3, 146.3, 146.0, 135.3, 131.2, 130.3, 129.7, 127.2, 111.1, 43.4, 14.8 ppm; HRMS (ESI-TOF) calcd for C<sub>77</sub>H<sub>68</sub>N<sub>12</sub>O<sub>8</sub>I<sub>2</sub> [M-2I]<sup>2+</sup> 771.1681, found: 771.1659; calcd for C<sub>77</sub>H<sub>68</sub>N<sub>12</sub>O<sub>8</sub>I [M-3I]<sup>3+</sup> 471.8104, found: 471.8111; calcd for C<sub>77</sub>H<sub>68</sub>N<sub>12</sub>O<sub>8</sub> [M-4I]<sup>4+</sup> 322.1315, found: 322.1319; Anal. Calcd. for C<sub>77</sub>H<sub>68</sub>N<sub>12</sub>O<sub>8</sub>I<sub>4</sub>•H<sub>2</sub>O: C, 50.95; H, 3.89; N, 9.26%, found: C, 50.14; H, 4.22; N, 8.96%.

[5][I]. Yellow solid (127 mg, yield: 71 %). <sup>1</sup>H NMR (DMSO-*d*<sub>6</sub>, 400 MHz):  $\delta$  10.05 (s, 1H, CH), 8.84 (s, 2H, Ar-H), 7.58 (m, 2H, Ar-H), 7.51 (m, 3H, Ar-H), 4.67 (q,  $J = 7.2$  Hz, 4H, NCH<sub>2</sub>), 1.59 (t,  $J = 7.2$  Hz, 6H, NCH<sub>2</sub>CH<sub>3</sub>) ppm. <sup>13</sup>C NMR (DMSO-*d*<sub>6</sub>, 100 MHz):  $\delta$  165.8, 145.4, 134.6, 131.7, 129.3, 128.9, 128.8, 128.3, 127.2, 42.9, 14.3 ppm. HRMS (ESI-TOF) calcd for C<sub>19</sub>H<sub>18</sub>N<sub>3</sub>O<sub>2</sub> [M-I]<sup>+</sup> 320.1394, found: 320.1401; Anal. Calcd. for C<sub>19</sub>H<sub>18</sub>N<sub>3</sub>O<sub>2</sub>I•H<sub>2</sub>O: C, 49.05; H, 4.33; N, 9.03%, found: C, 49.91; H, 4.11; N, 9.26%.

### General Synthetic Procedure for Poly-nuclear Ni-NHC complexes.

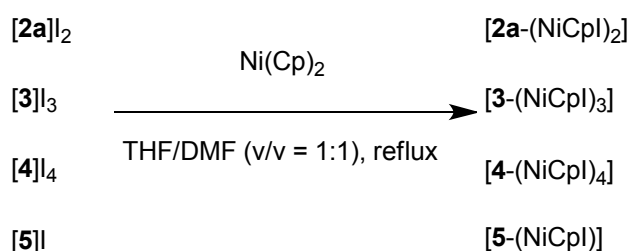

0.07 mmol of poly-benzimidazolium salt and NiCp<sub>2</sub> (29 mg for [2a-(NiCpI)]<sub>2</sub>, 44 mg for [3-(NiCpI)]<sub>3</sub>, 58 mg for [4-(NiCpI)]<sub>4</sub>, and 15 mg for [5-(NiCpI)]) were dissolved in 10 mL of anhydrous THF/DMF (v/v = 1:1). The reaction mixture was refluxed for two days under N<sub>2</sub> to yield a dark red solution. After reaction, 20 mL of diethyl ether and 10 mL of hexane were added to the solution to yield dark red precipitates. The solid was collected and washed with hexane (5 mL) and diethyl ether (5 mL x 2). The nickel complex was further purified by re-precipitation of product from CH<sub>2</sub>Cl<sub>2</sub> solution with diethyl ether, and dried under vacuum.

[**2a**-(NiCpI)<sub>2</sub>]. Crimson solid (44 mg, yield: 59%). <sup>1</sup>H NMR (CDCl<sub>3</sub>, 400 MHz): δ 7.90 (s, 4H, Ar-H), 7.67 (s, 4H, Ar-H), 5.48 (s, 10H, Cp), 5.29 (m, 4H, NCH<sub>2</sub>), 5.08 (m, 4H, NCH<sub>2</sub>), 1.69 (t, *J* = 7.2 Hz, 12H, NCH<sub>2</sub>CH<sub>3</sub>) ppm. <sup>13</sup>C NMR (CDCl<sub>3</sub>, 100 MHz): δ 191.7, 166.4, 138.8, 131.2, 126.9, 126.3, 105.8, 92.7, 46.0, 14.7 ppm. HRMS (ESI-TOF) calcd for C<sub>42</sub>H<sub>38</sub>N<sub>6</sub>O<sub>4</sub>Ni<sub>2</sub>I [M-I]<sup>1+</sup> 933.0701, found: 933.0685; calcd for C<sub>42</sub>H<sub>38</sub>N<sub>6</sub>O<sub>4</sub>Ni<sub>2</sub> [M-2I]<sup>2+</sup> 403.0825, found: 403.0829; Anal. Calcd. for C<sub>42</sub>H<sub>38</sub>N<sub>6</sub>O<sub>4</sub>Ni<sub>2</sub>I<sub>2</sub>: C, 47.50; H, 3.61; N, 7.91%, found: C, 46.69; H, 3.64; N, 7.43%.

[**3**-(NiCpI)<sub>3</sub>]. Crimson solid (50 mg, yield: 40%). <sup>1</sup>H NMR (CDCl<sub>3</sub>, 400 MHz): δ 7.85 (m, 15H, Ar-H), 7.62 (d, *J* = 7.2 Hz, 6H, Ar-H), 5.48 (s, 15H, Cp), 5.30 (m, 6H, NCH<sub>2</sub>), 5.04 (m, 6H, NCH<sub>2</sub>), 1.67 (m, 18H, CH<sub>3</sub>) ppm. <sup>13</sup>C NMR (CDCl<sub>3</sub>, 100 MHz): δ 191.5, 166.7, 141.5, 140.6, 138.8, 131.2, 128.1, 126.9, 126.4, 125.4, 105.7, 92.6, 46.0, 14.7 ppm. HRMS (ESI-TOF) calcd for C<sub>78</sub>H<sub>66</sub>N<sub>9</sub>O<sub>6</sub>Ni<sub>3</sub>I [M-2I]<sup>2+</sup> 762.6115, found: 762.6084; calcd for C<sub>78</sub>H<sub>66</sub>N<sub>9</sub>O<sub>6</sub>Ni<sub>3</sub> [M-3I]<sup>3+</sup> 466.1060, found: 466.1077; Anal. Calcd. for C<sub>78</sub>H<sub>66</sub>N<sub>9</sub>O<sub>6</sub>Ni<sub>3</sub>I<sub>3</sub>: C, 52.57; H, 3.73; N, 7.07%, found: C, 52.68; H, 4.06; N, 7.19%.

[**4**-(NiCpI)<sub>4</sub>]. Crimson solid (125 mg, yield: 78%). <sup>1</sup>H NMR (CDCl<sub>3</sub>, 400 MHz): δ 7.88 (s, 8H, Ar-H), 7.47 (m, 24H, Ar-H), 5.46 (s, 20H, Cp), 5.27 (m, 8H, NCH<sub>2</sub>), 5.06 (m, 8H, NCH<sub>2</sub>), 1.67 (s, 24H, CH<sub>3</sub>) ppm. <sup>13</sup>C NMR (CDCl<sub>3</sub>, 100 MHz): δ 191.6, 191.4, 166.6, 138.8, 131.7, 126.4, 125.4, 105.7, 92.6, 46.0, 14.7 ppm. HRMS (ESI-TOF) calcd for C<sub>97</sub>H<sub>84</sub>N<sub>12</sub>O<sub>8</sub>Ni<sub>4</sub>I<sub>2</sub> [M-2I]<sup>2+</sup> 1015.1014, found: 1015.1027; calcd for C<sub>97</sub>H<sub>84</sub>N<sub>12</sub>O<sub>8</sub>Ni<sub>4</sub>I [M-3I]<sup>3+</sup> 634.4326, found: 634.4326; calcd for C<sub>97</sub>H<sub>84</sub>N<sub>12</sub>O<sub>8</sub>Ni<sub>4</sub> [M-4I]<sup>4+</sup> 444.0982, found: 444.0973; Anal. Calcd. for C<sub>97</sub>H<sub>84</sub>N<sub>12</sub>O<sub>8</sub>Ni<sub>4</sub>I<sub>4</sub>: C, 50.92; H, 3.70; N, 7.35%, found: C, 50.36; H, 3.90; N, 6.75%.

[**5**-(NiCpI)]. Crimson solid (20 mg, yield: 52%). <sup>1</sup>H NMR (CDCl<sub>3</sub>, 400 MHz): δ 7.85 (s, 2H, Ar-H), 7.49 (m, 2H, Ar-H), 7.42 (m, 3H, Ar-H), 5.44 (s, 5H, Cp), 5.24 (m, 2H, NCH<sub>2</sub>), 5.03 (m, 2H, NCH<sub>2</sub>), 1.65 (t, *J* = 7.2 Hz, 6H, NCH<sub>2</sub>CH<sub>3</sub>) ppm. <sup>13</sup>C NMR (CDCl<sub>3</sub>, 100 MHz): δ 191.4, 166.7, 138.7, 131.6, 129.2, 128.3, 126.5, 105.7, 92.6, 45.9, 14.7 ppm. HRMS (ESI-TOF) calcd for C<sub>24</sub>H<sub>22</sub>N<sub>3</sub>O<sub>2</sub>Ni [M-I]<sup>+</sup> 442.1060, found: 442.1068; Anal. Calcd. for C<sub>24</sub>H<sub>22</sub>N<sub>3</sub>O<sub>2</sub>NiI•C<sub>4</sub>H<sub>10</sub>O: C, 52.21; H, 5.01; N, 6.52%, found: C, 52.52; H, 4.34; N, 6.68%.

**General Synthetic Procedure for Poly-nuclear Rh-NHC complexes.** 0.04 mol of Poly-benzimidazolium salt and K<sup>t</sup>OBu (8.8 mg for [**2a**-[Rh(COD)I]<sub>2</sub>], 13 mg for [**3**-

[Rh(COD)I]<sub>3</sub>], and 18 mg for [4-[Rh(COD)I]<sub>4</sub>]) were dissolved in 10 mL of anhydrous THF/DMF (v/v = 3:2). After stirring for 1 h at room temperature, [Rh(COD)Cl]<sub>2</sub> (22 mg for [2a-[Rh(COD)I]<sub>2</sub>], 33 mg for [3-[Rh(COD)I]<sub>3</sub>], and 44 mg for [4-[Rh(COD)I]<sub>4</sub>]) was added and stirred for 18 h at room temperature to yield a yellow solution. After reaction, the insoluble solids were filtered off, and 20 mL of diethyl ether was added to the filtrate to give yellow precipitates. The precipitates were then collected and washed with diethyl ether (2 mL x 2) and hexane (2 mL).

[2a-[Rh(COD)I]<sub>2</sub>]. Yellow brown solid (7 mg, yield: 15%). <sup>1</sup>H NMR (CDCl<sub>3</sub>, 400 MHz): δ 7.86 (s, 4H, Ar-H), 7.66 (s, 4H, Ar-H), 5.44 (s, 4H, COD), 5.14 (q, *J* = 7.2 Hz, 4H, NCH<sub>2</sub>), 4.84 (q, *J* = 7.2 Hz, 4H, NCH<sub>2</sub>), 3.55 (s, 4H, COD), 2.41 (m, 8H, COD), 2.09 (m, 4H, COD), 1.92 (m, 4H, COD), 1.70 (t, *J* = 7.2 Hz, 12H, CH<sub>3</sub>) ppm. <sup>13</sup>C NMR (CDCl<sub>3</sub>, 100 MHz): δ 204.3, 204.1, 166.6, 138.5, 131.2, 126.9, 126.0, 105.7, 105.5, 105.2, 99.6, 99.5, 73.0, 72.9, 44.4, 32.2, 29.4, 14.4 ppm. HRMS (ESI-TOF) calcd for C<sub>48</sub>H<sub>52</sub>N<sub>6</sub>O<sub>4</sub>Rh<sub>2</sub> [M-2I]<sup>2+</sup> 491.1075, found: 491.1085

[3-[Rh(COD)I]<sub>3</sub>]. Yellow brown solid (11 mg, yield: 13%). <sup>1</sup>H NMR (CDCl<sub>3</sub>, 400 MHz): δ 7.86 (m, 15H, Ar-H), 7.62 (d, 6H, *J* = 8.4 Hz, Ar-H), 5.45 (s, 6H, COD), 5.14 (m, 6H, NCH<sub>2</sub>), 4.85 (m, 6H, NCH<sub>2</sub>), 3.56 (s, 6H, COD), 2.42 (m, 12H, COD), 2.09 (m, 6H, COD), 1.92 (m, 6H, COD), 1.70 (t, *J* = 7.2 Hz, 18H, CH<sub>3</sub>) ppm. <sup>13</sup>C NMR (CDCl<sub>3</sub>, 100 MHz): δ 203.9, 166.9, 141.6, 140.7, 138.5, 131.3, 128.1, 128.0, 126.9, 126.2, 125.5, 105.6, 99.6, 73.0, 72.9, 44.4, 32.2, 29.4, 28.0, 14.4 ppm. HRMS (ESI-TOF) calcd for C<sub>87</sub>H<sub>87</sub>N<sub>9</sub>O<sub>6</sub>Rh<sub>3</sub>I [M-2I]<sup>2+</sup> 894.6489, found: 894.6455; calcd for C<sub>87</sub>H<sub>88</sub>N<sub>9</sub>O<sub>6</sub>Rh<sub>3</sub> [M-3I]<sup>3+</sup> 554.1309, found: 554.1322.

[4-[Rh(COD)I]<sub>4</sub>]. Light brown solid (17 mg, yield: 16%). <sup>1</sup>H NMR (CDCl<sub>3</sub>, 400 MHz): δ 7.84 (s, 8H, Ar-H), 7.48 (m, 16H, Ar-H), 5.43 (s, 8H, COD), 5.13 (q, *J* = 7.2 Hz, 8H, NCH<sub>2</sub>), 4.83 (q, *J* = 7.2 Hz, 8H, NCH<sub>2</sub>), 3.54 (s, 8H, COD), 2.41 (m, 16H, COD), 2.06 (m, 8H, COD), 1.91 (m, 8H, COD), 1.69 (t, *J* = 7.2 Hz, 24H, CH<sub>3</sub>) ppm. <sup>13</sup>C NMR (CDCl<sub>3</sub>, 100 MHz): δ 204.2, 203.8, 166.7, 145.4, 138.5, 131.7, 130.1, 128.7, 126.2, 125.4, 105.6, 99.5, 99.4, 73.0, 72.9, 65.8, 64.4, 44.4, 32.2, 29.4, 14.4 ppm. HRMS (ESI-TOF) calcd for C<sub>109</sub>H<sub>112</sub>N<sub>12</sub>O<sub>8</sub>Rh<sub>4</sub>I<sub>2</sub> [M-2I]<sup>2+</sup> 1191.1512, found: 1191.1505; calcd for C<sub>109</sub>H<sub>112</sub>N<sub>12</sub>O<sub>8</sub>Rh<sub>4</sub>I [M-3I]<sup>3+</sup> 751.7991, found: 751.8009; Anal. Calcd. for C<sub>109</sub>H<sub>112</sub>N<sub>12</sub>O<sub>8</sub>Rh<sub>4</sub>I<sub>4</sub>: C, 49.64; H, 4.28; N, 6.37%, found: C, 48.91; H, 4.55; N, 6.40%.

**Hydrothiolation of 1-Heptyne.** A stock solution containing thiophenol (8.95 mmole), 1-heptyne (3.60 mmole), and triethylamine (0.215 mmole) in 4 mL of CDCl<sub>3</sub> was

prepared in a glove box. To the stock solution 8.95 mmole of naphthalene was added as internal standard. Then, 0.8 mL of the resulting solution was added to Young's NMR tube loaded with catalysts consisting of 3 mol% of Ni atom (12.2 mg of [**5**-(NiCpI)], 11.4 mg of [**2a**-(NiCpI)<sub>2</sub>], 12.8 mg of [**3**-(NiCpI)<sub>3</sub>], or 12.2 mg of [**4**-(NiCpI)<sub>4</sub>]). The solution was heated at 60 °C and was monitored with NMR spectroscopy. Product yield was calculated based on the integration of the multiplets centered at 8.61 ppm (naphthalene) and the terminal alkene C=CH<sub>2</sub> detected at 5.43 and 5.22 ppm.

| Reaction time (h) | Yield of alkene (%)  |                                     |                                    |                                    |
|-------------------|----------------------|-------------------------------------|------------------------------------|------------------------------------|
|                   | [ <b>5</b> -(NiCpI)] | [ <b>2a</b> -(NiCpI) <sub>2</sub> ] | [ <b>3</b> -(NiCpI) <sub>3</sub> ] | [ <b>4</b> -(NiCpI) <sub>4</sub> ] |
| 4                 | 3                    | 7                                   | 6                                  | 8                                  |
| 8                 | 11                   | 13                                  | 13                                 | 17                                 |
| 12                | 26                   | 22                                  | 23                                 | 30                                 |
| 16                | 50                   | 38                                  | 38                                 | 41                                 |
| 24                | 58                   | 54                                  | 52                                 | 61                                 |
| 36                | 68                   | 77                                  | 76                                 | 72                                 |

#### References:

1. G. Gattuso, G. Grasso, N. Marino, A. Notti, A. Pappalardo, S. Pappalardo and M. F. Parisi, *Eur. J. Org. Chem.*, 2011, **2011**, 5696-5703.
2. P. Ganesan, X. Yang, J. Loos, T. J. Savenije, R. D. Abellon, H. Zuilhof and E. J. R. Sudhölter, *J. Am. Chem. Soc.*, 2005, **127**, 14530-14531.
3. S. B. Kalindjian, D. J. Dunstone, C. M. R. Low, M. J. Pether, S. P. Roberts, M. J. Tozer, G. F. Watt and N. P. Shankley, *J. Med. Chem.*, 2001, **44**, 1125-1133.

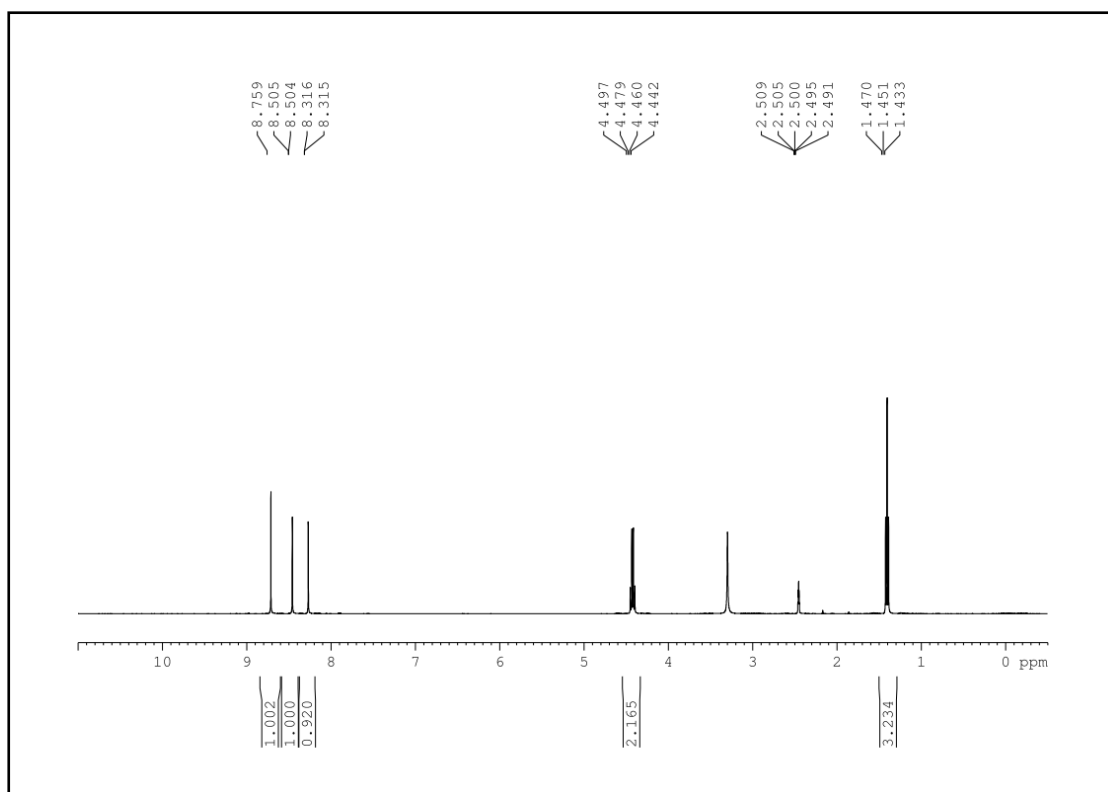

Figure S1 <sup>1</sup>H NMR spectrum of compound **1** (400 MHz, DMSO-*d*<sub>6</sub>)

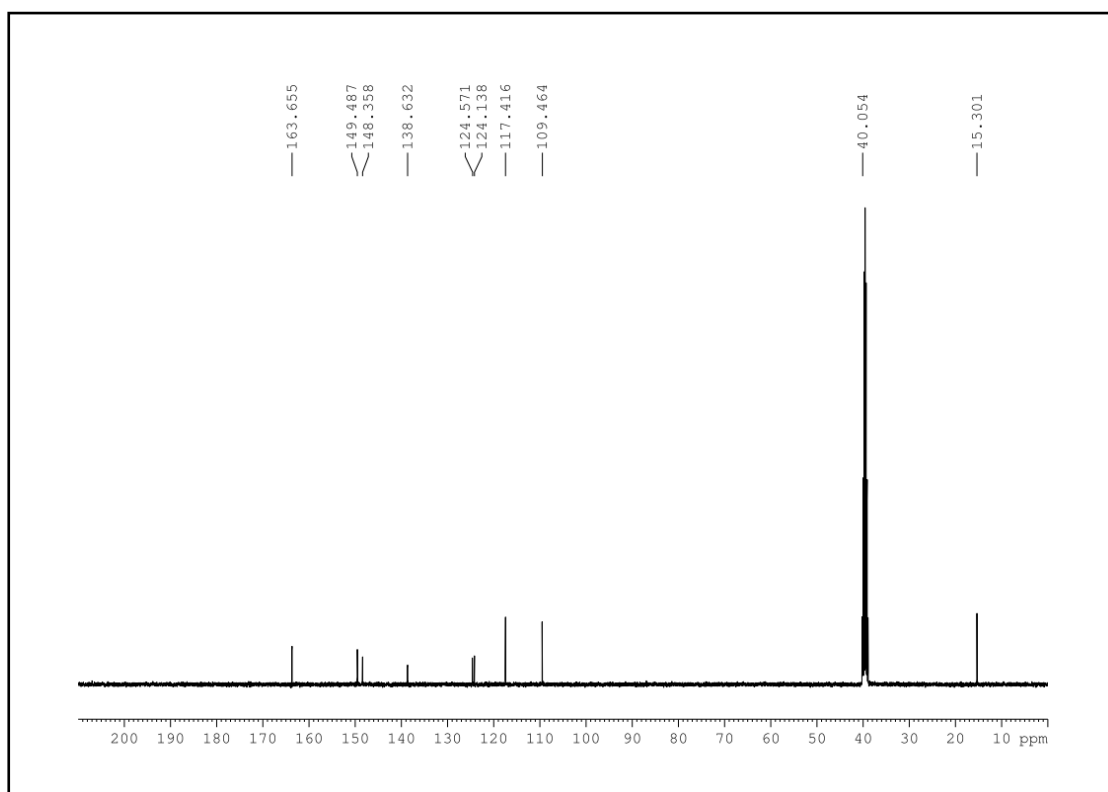

Figure S2 <sup>13</sup>C NMR spectrum of compound **1** (100 MHz, DMSO-*d*<sub>6</sub>)

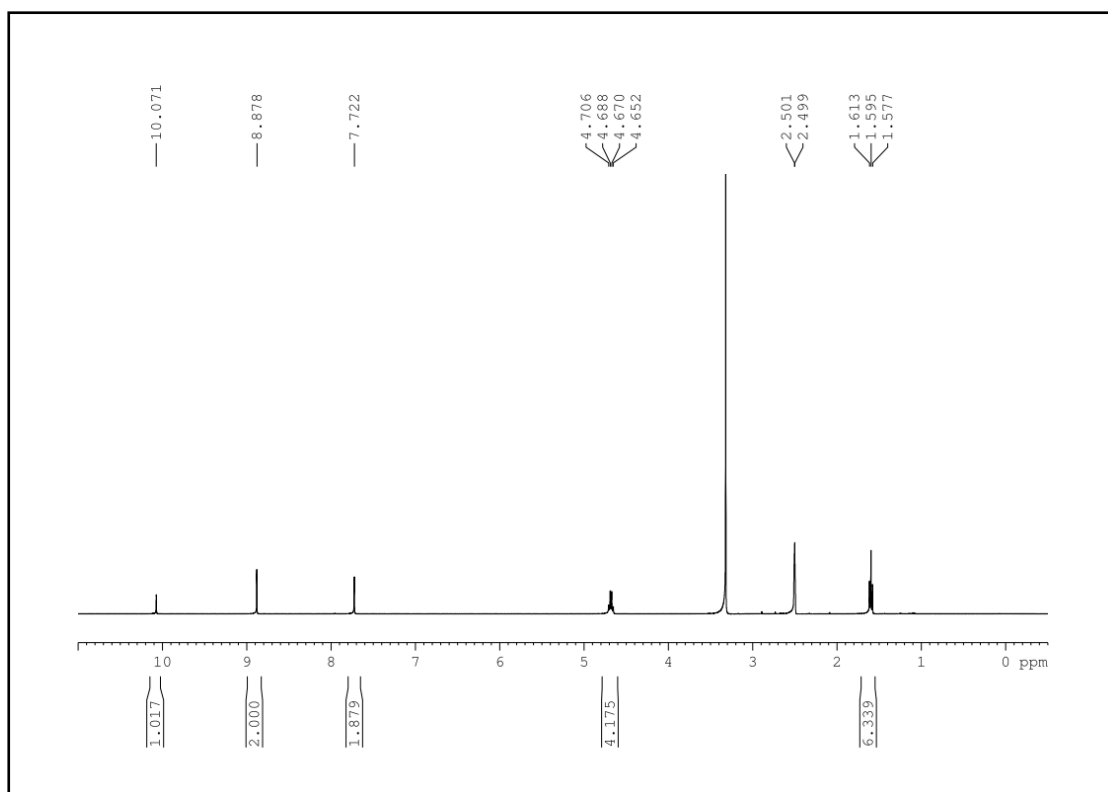

Figure S3 <sup>1</sup>H NMR spectrum of compound **[2a][I]<sub>2</sub>** (400 MHz, DMSO-*d*<sub>6</sub>)

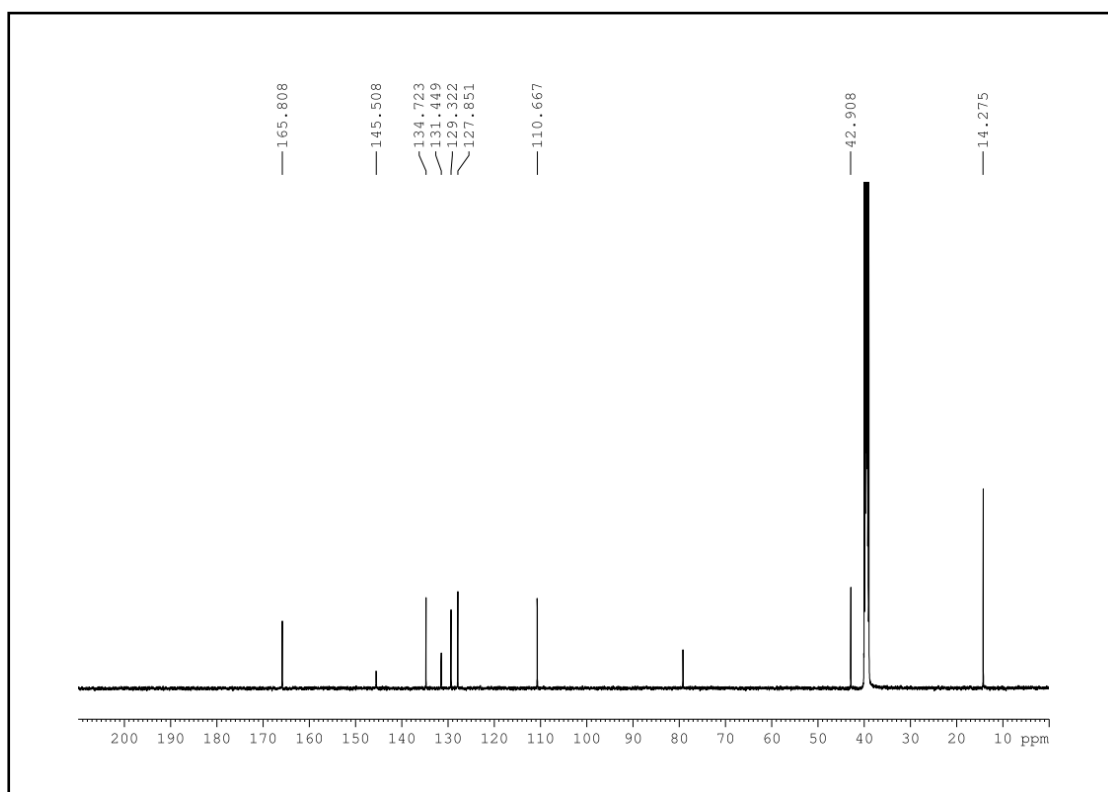

Figure S4 <sup>13</sup>C NMR spectrum of compound **[2a][I]<sub>2</sub>** (100 MHz, DMSO-*d*<sub>6</sub>)

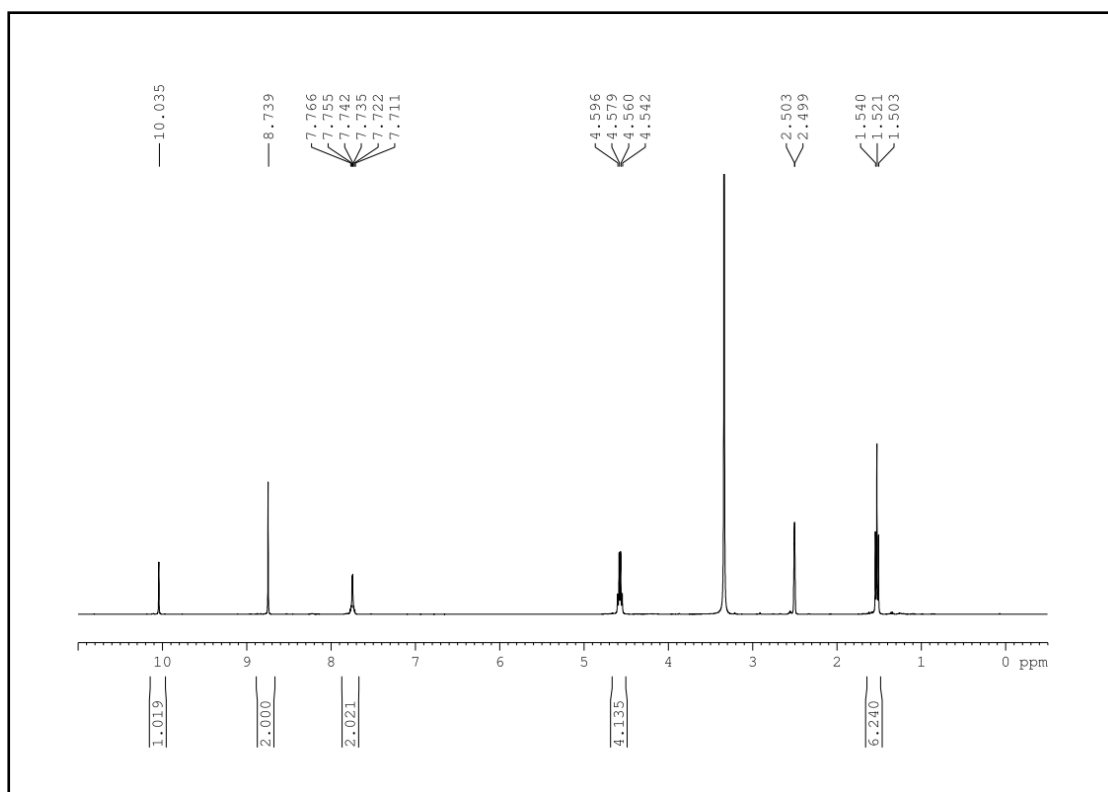

Figure S5  $^1\text{H}$  NMR spectrum of compound  $[\mathbf{2b}][\text{I}]_2$  (400 MHz,  $\text{DMSO-}d_6$ )

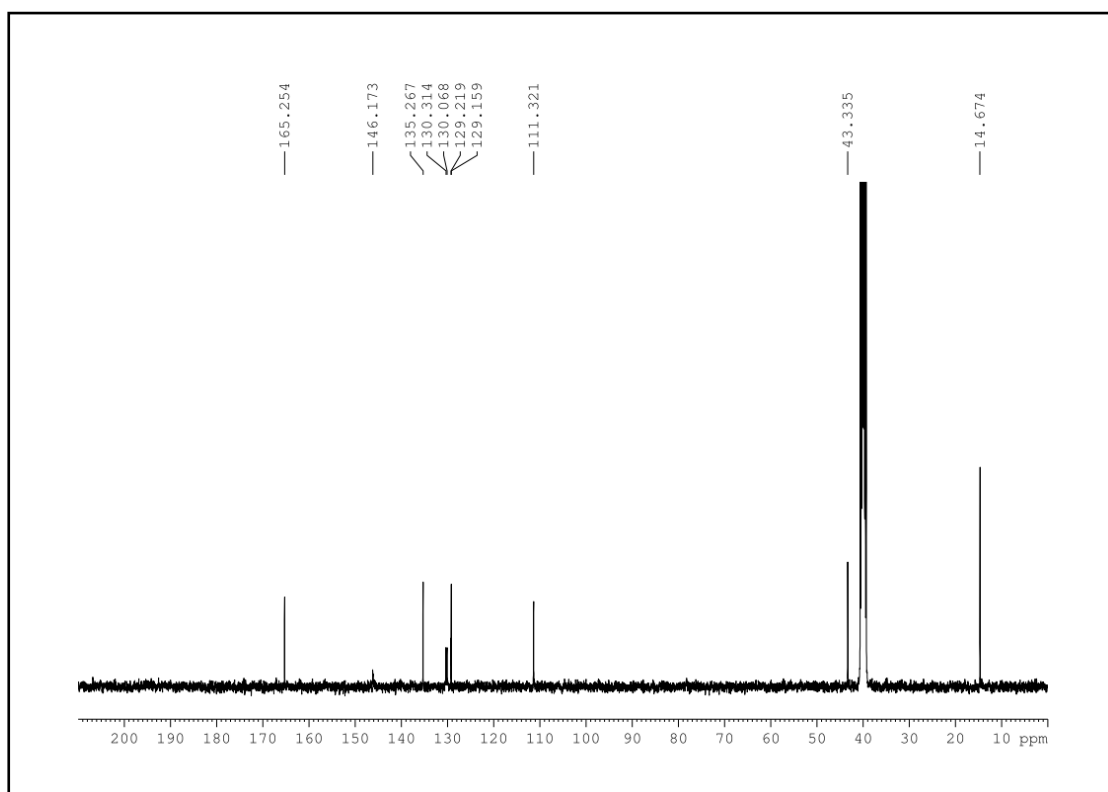

Figure S6  $^{13}\text{C}$  NMR spectrum of compound  $[\mathbf{2b}][\text{I}]_2$  (100 MHz,  $\text{DMSO-}d_6$ )

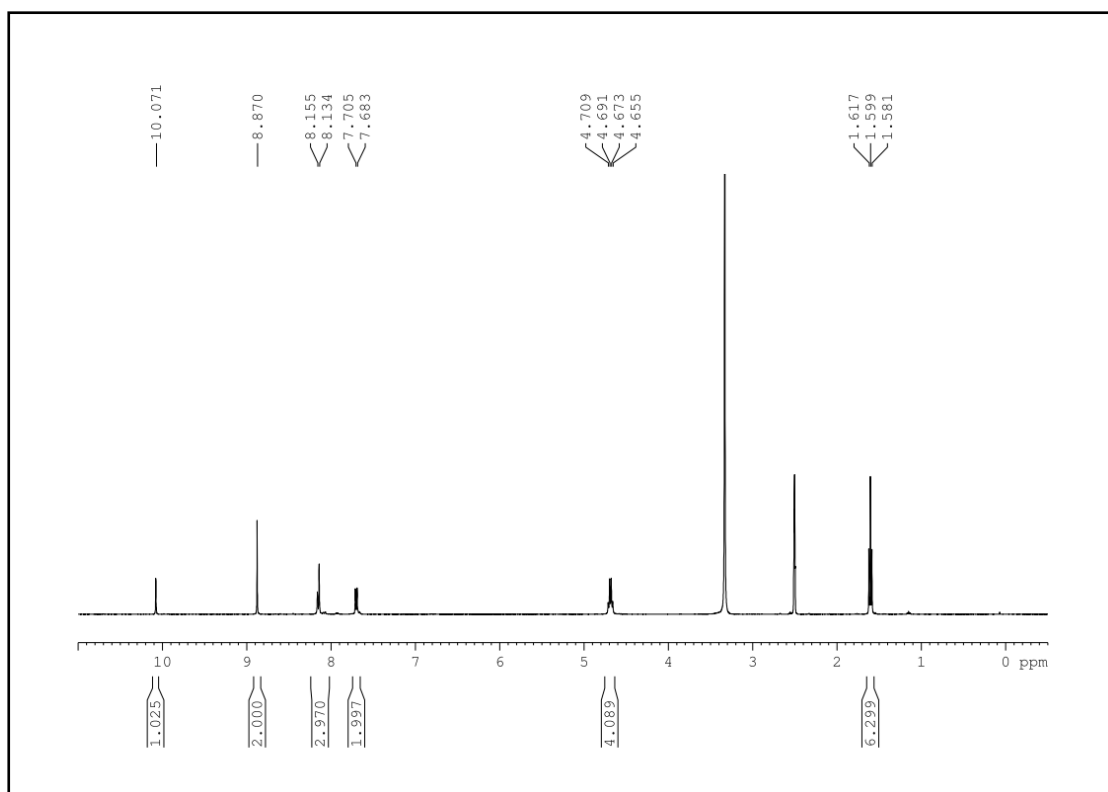

Figure S7 <sup>1</sup>H NMR spectrum of compound **[3][I]<sub>3</sub>** (400 MHz, DMSO-*d*<sub>6</sub>)

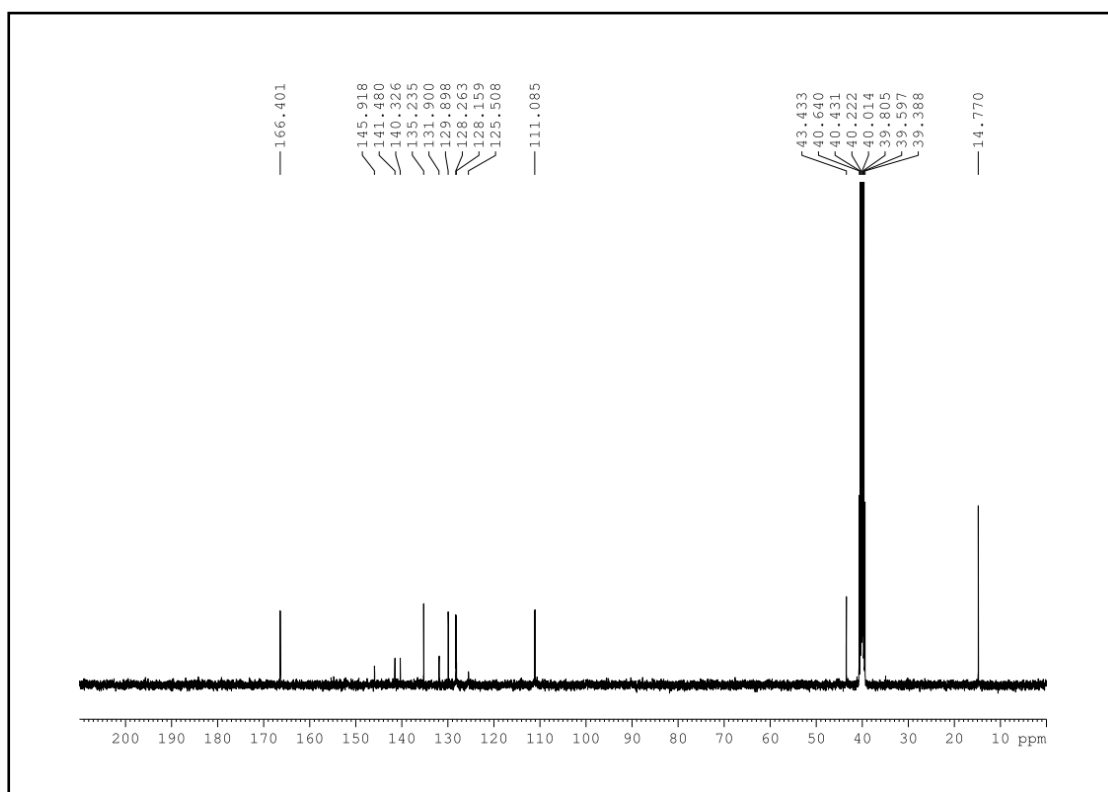

Figure S8 <sup>13</sup>C NMR spectrum of compound **[3][I]<sub>3</sub>** (100 MHz, DMSO-*d*<sub>6</sub>)

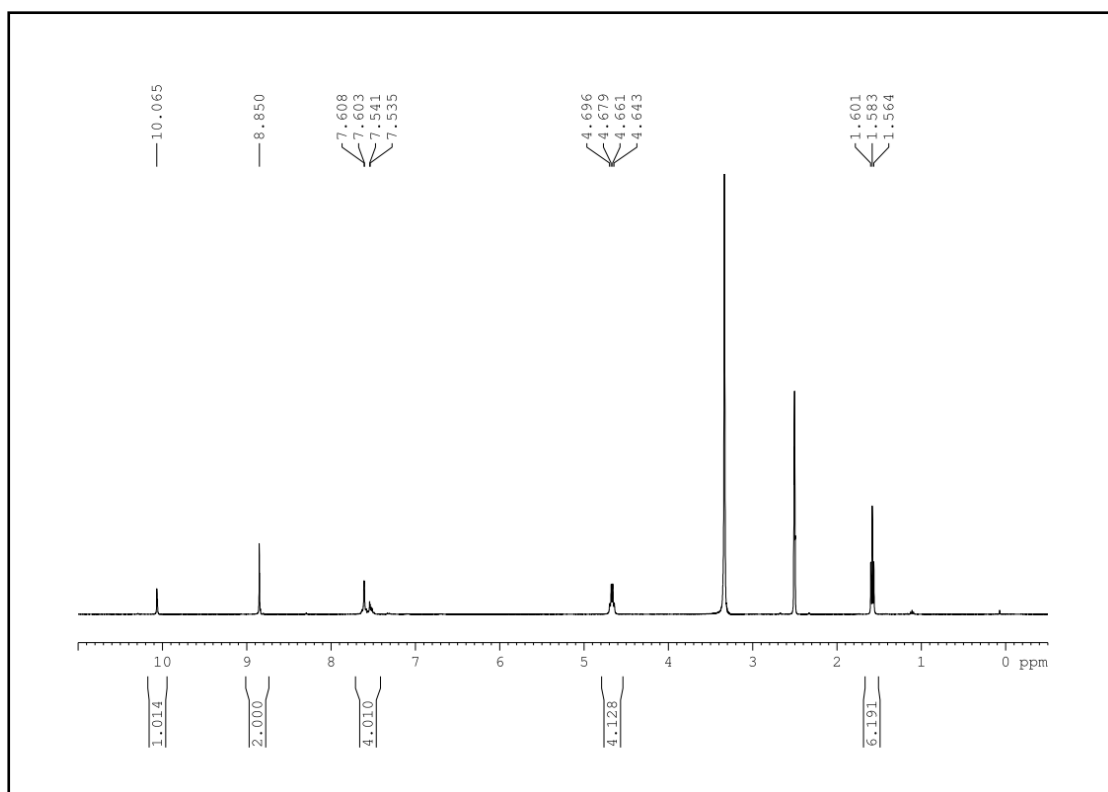

Figure S9 <sup>1</sup>H NMR spectrum of compound [4][I]<sub>4</sub> (400 MHz, DMSO-*d*<sub>6</sub>)

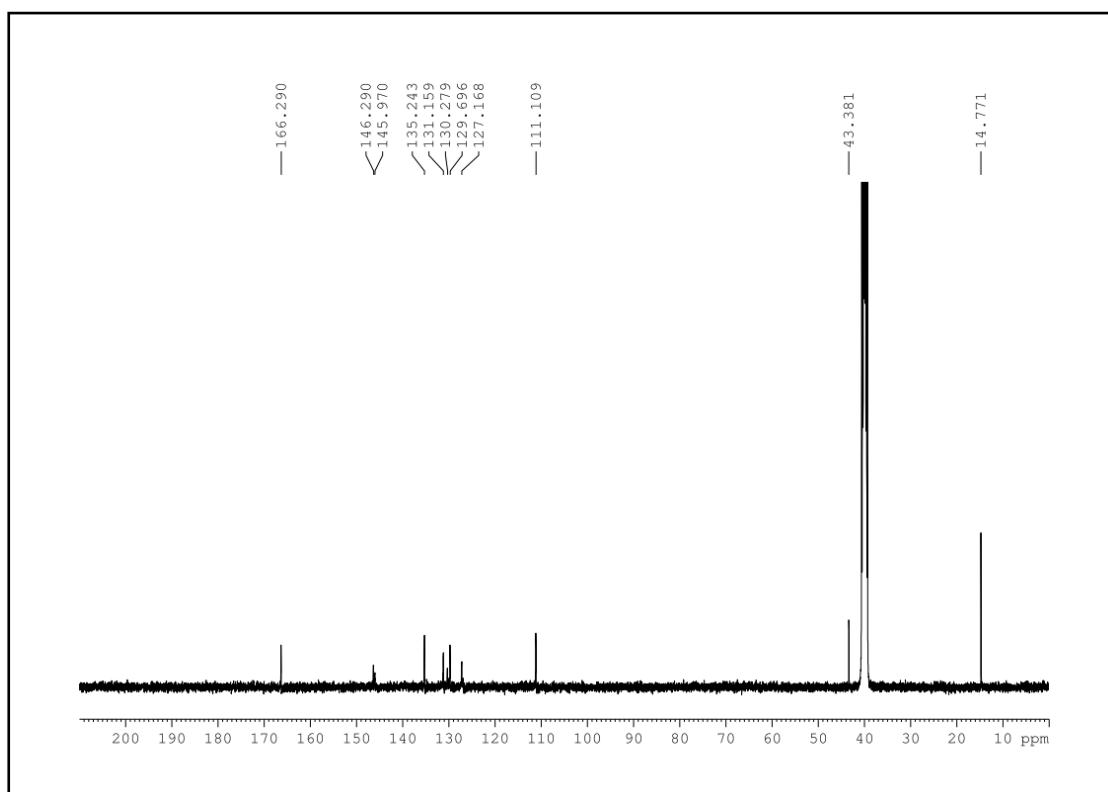

Figure S10 <sup>13</sup>C NMR spectrum of compound [4][I]<sub>4</sub> (100 MHz, DMSO-*d*<sub>6</sub>)

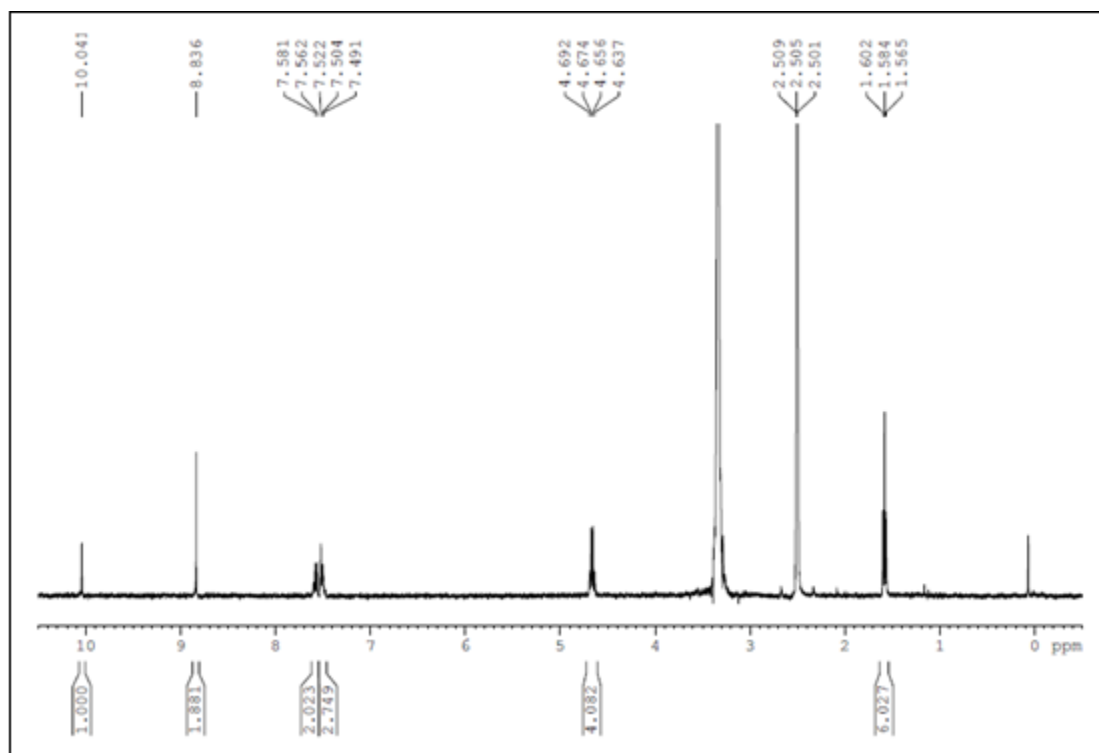

Figure S11 <sup>1</sup>H NMR spectrum of compound [5][I] (400 MHz, DMSO-*d*<sub>6</sub>)

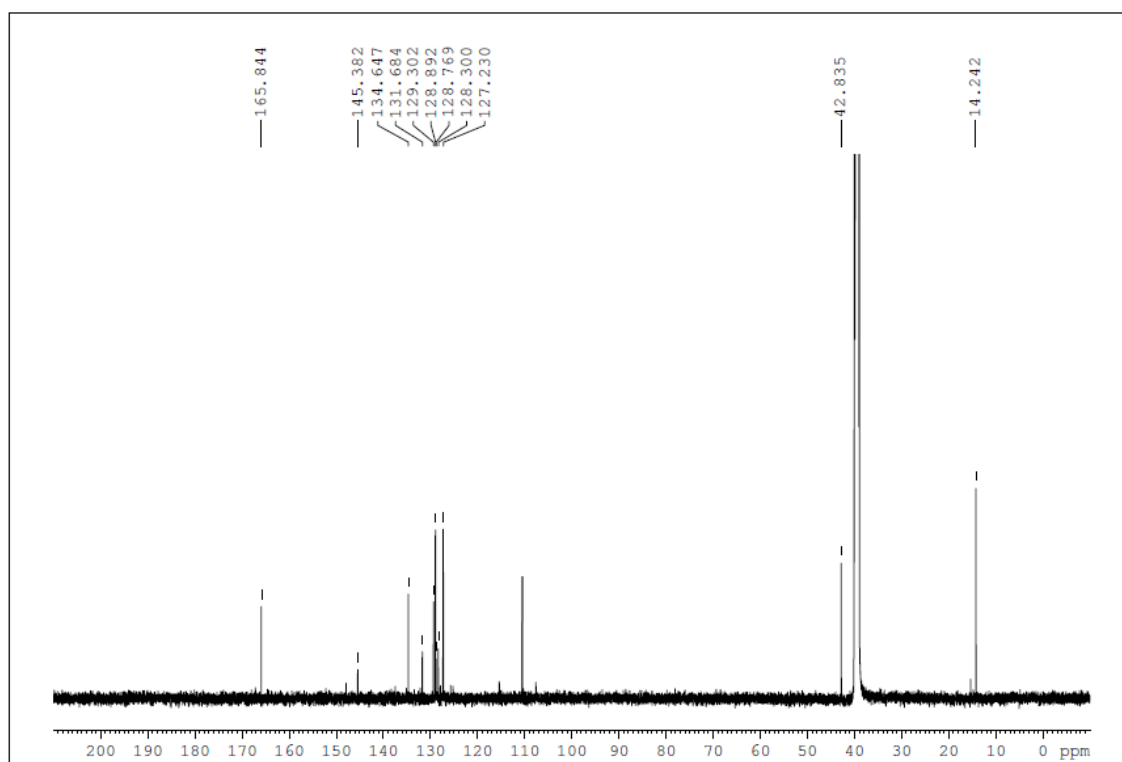

Figure S12 <sup>13</sup>C NMR spectrum of compound [5][I] (100 MHz, DMSO-*d*<sub>6</sub>)

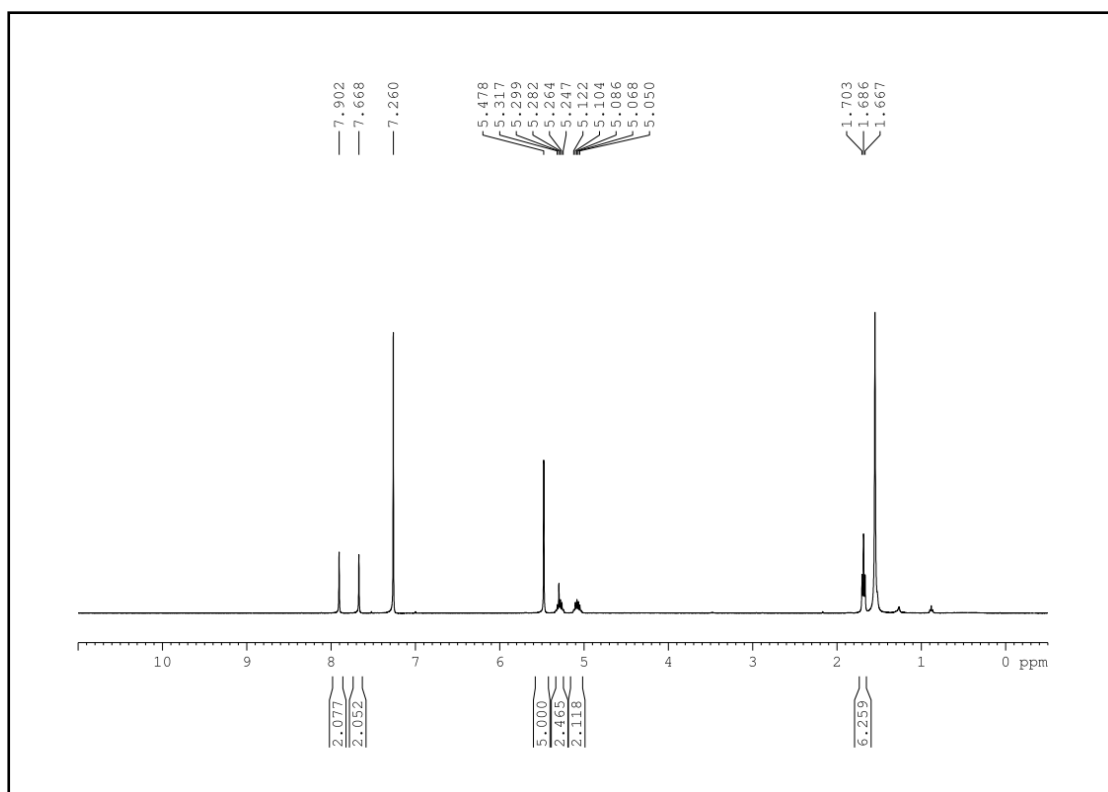

Figure S13 <sup>1</sup>H NMR spectrum of compound **[2a-(NiCpI)<sub>2</sub>]** (400 MHz, CDCl<sub>3</sub>)

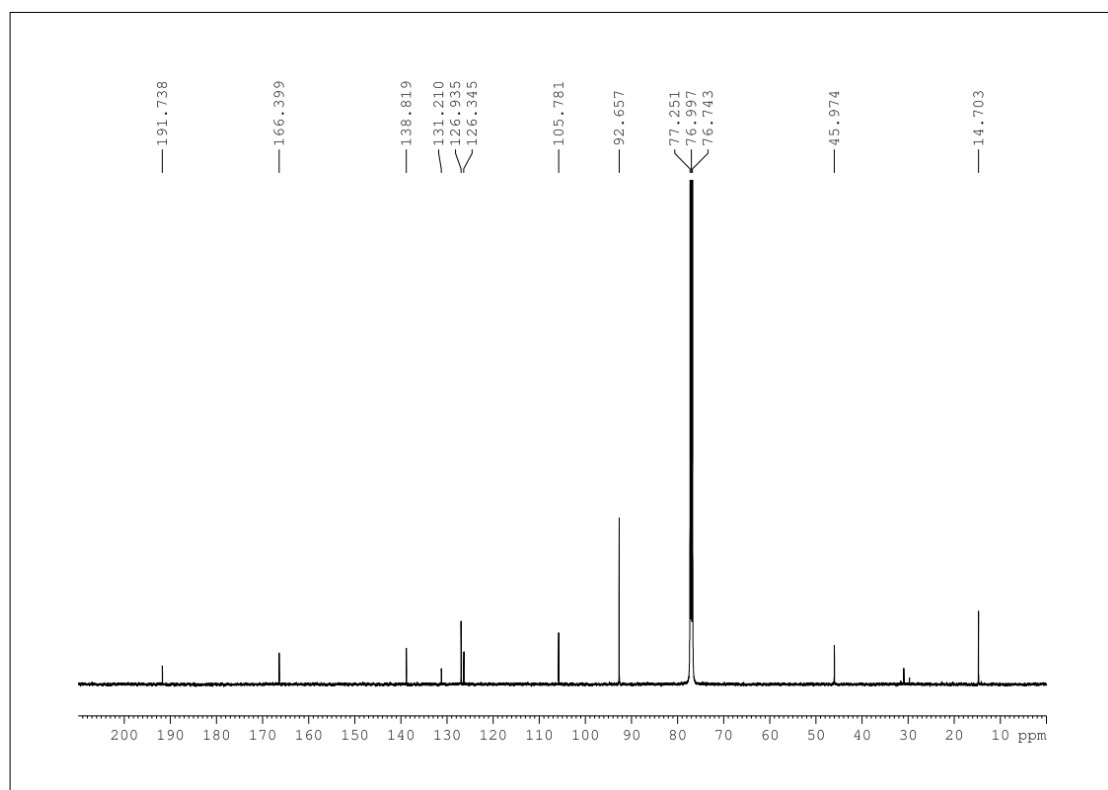

Figure S14 <sup>13</sup>C NMR spectrum of compound **[2a-(NiCpI)<sub>2</sub>]** (100 MHz, CDCl<sub>3</sub>)

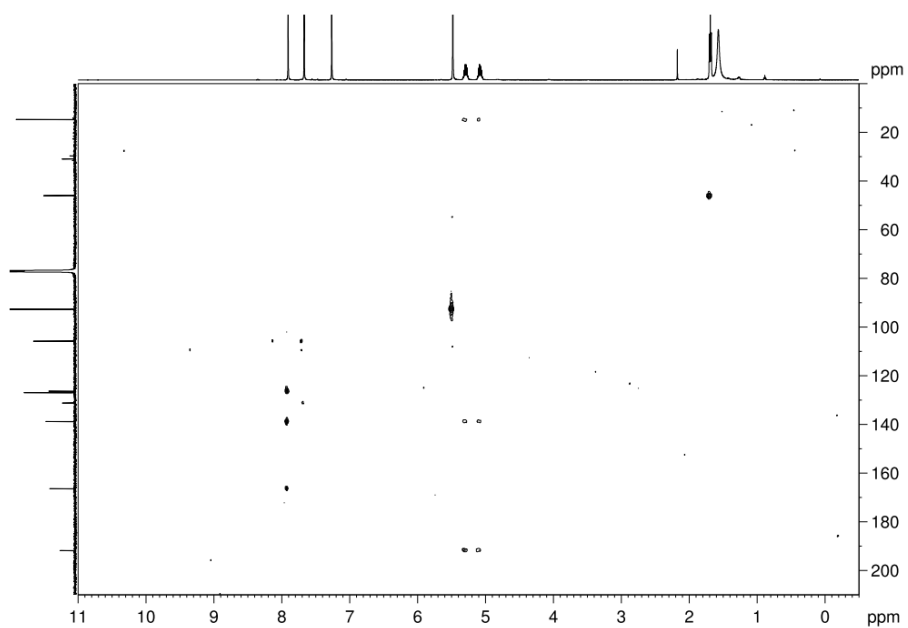

Figure S15 HMBC spectrum of compound **[2a-(NiCpI)<sub>2</sub>]**

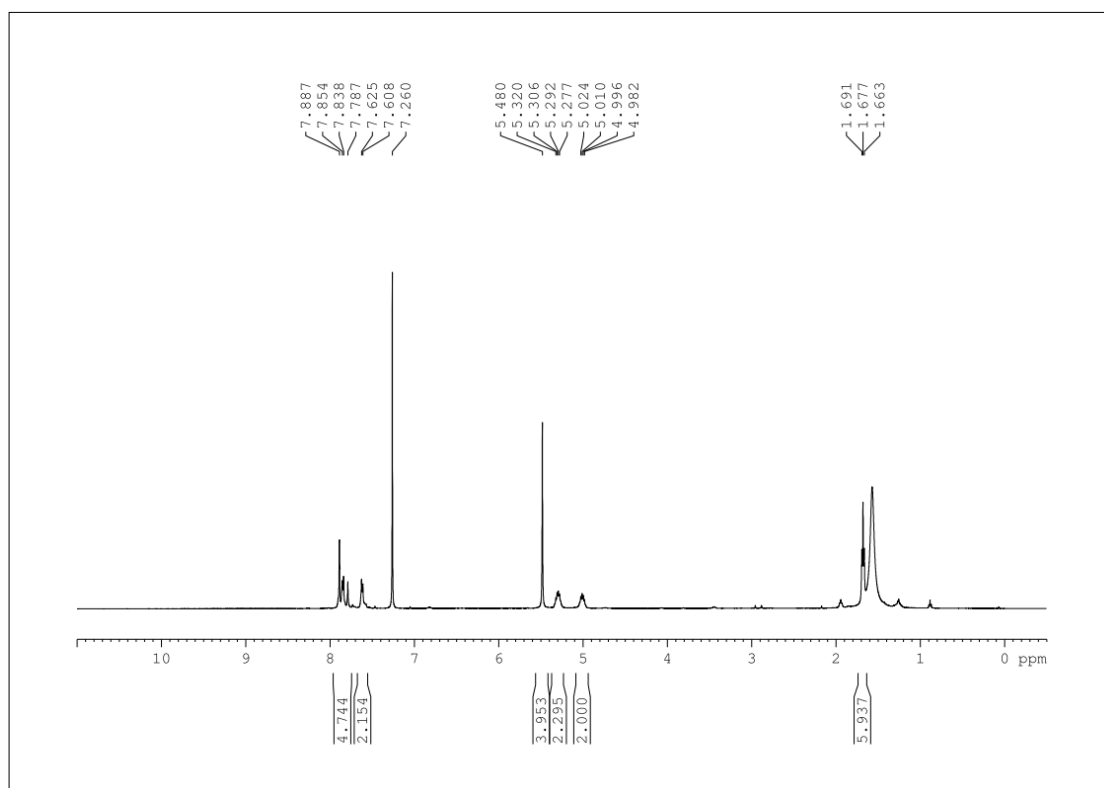

Figure S16  $^1\text{H}$  NMR spectrum of compound **[3-(NiCpI)<sub>3</sub>]** (400 MHz,  $\text{CDCl}_3$ )

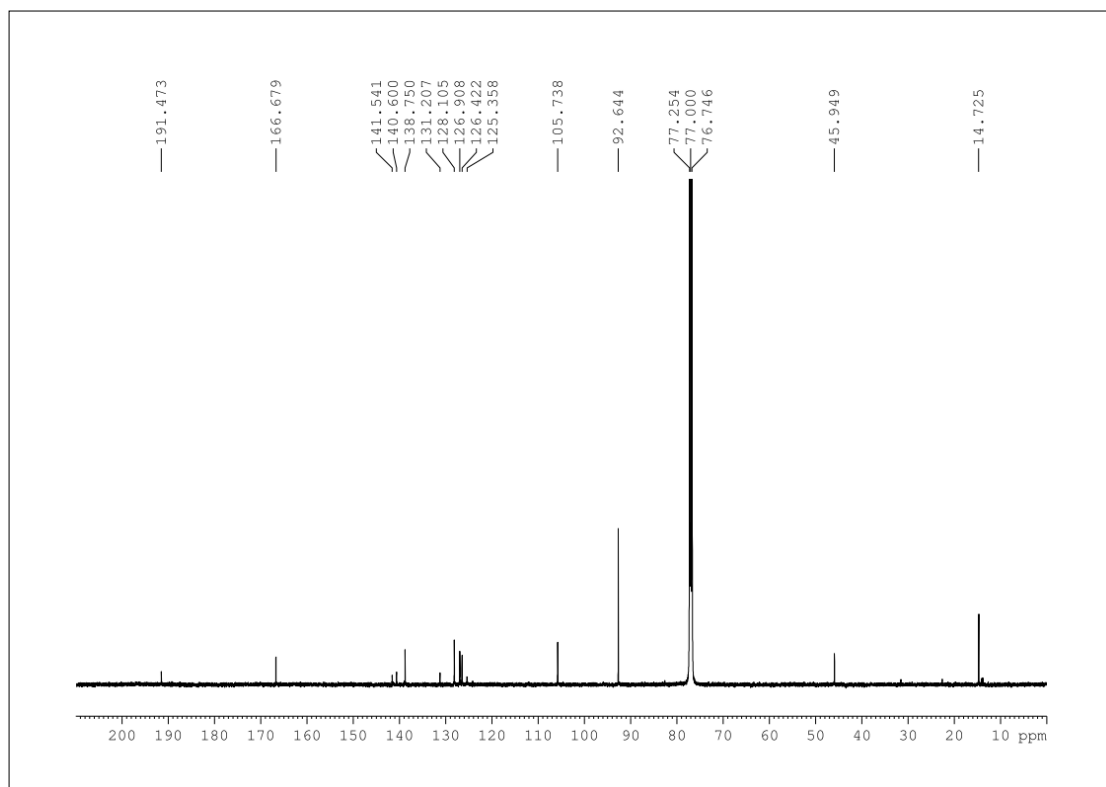

Figure S17 <sup>13</sup>C NMR spectrum of compound [3-(NiCpI)<sub>3</sub>] (100 MHz, CDCl<sub>3</sub>)

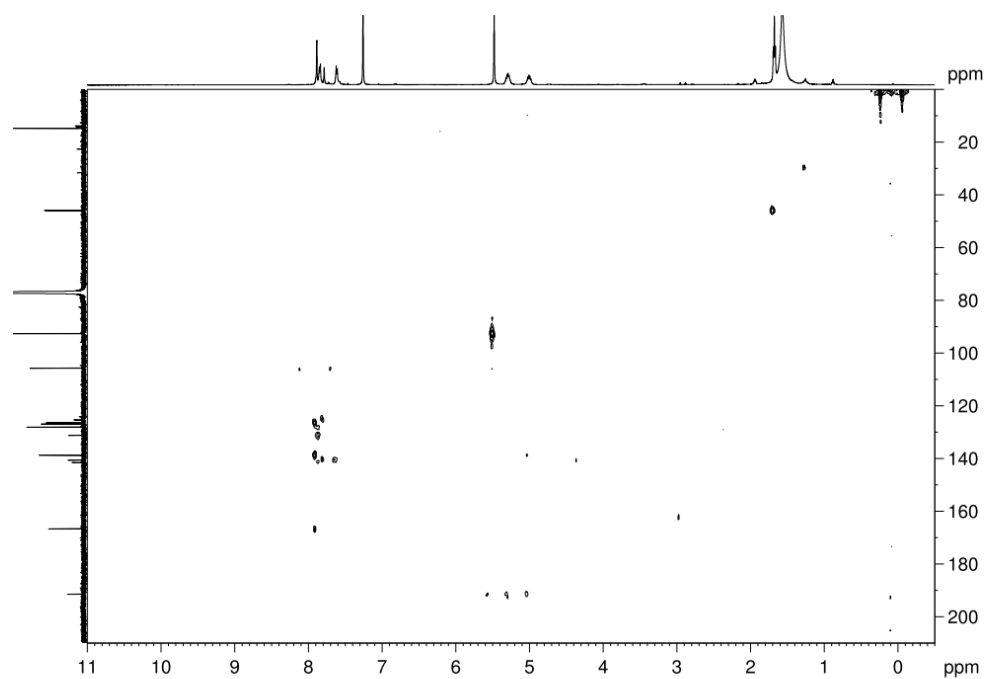

Figure S18 HMBC spectrum of compound [3-(NiCpI)<sub>3</sub>]

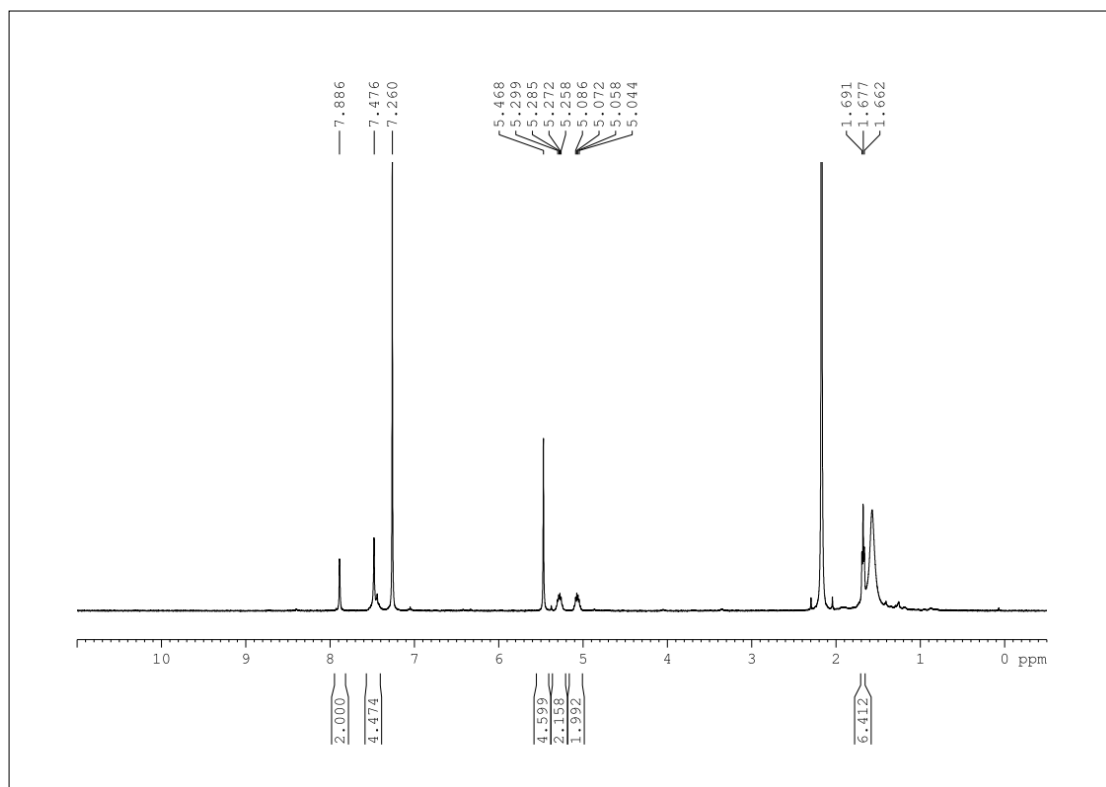

Figure S19 <sup>1</sup>H NMR spectrum of compound [4-(NiCpI)<sub>4</sub>] (400 MHz, CDCl<sub>3</sub>)

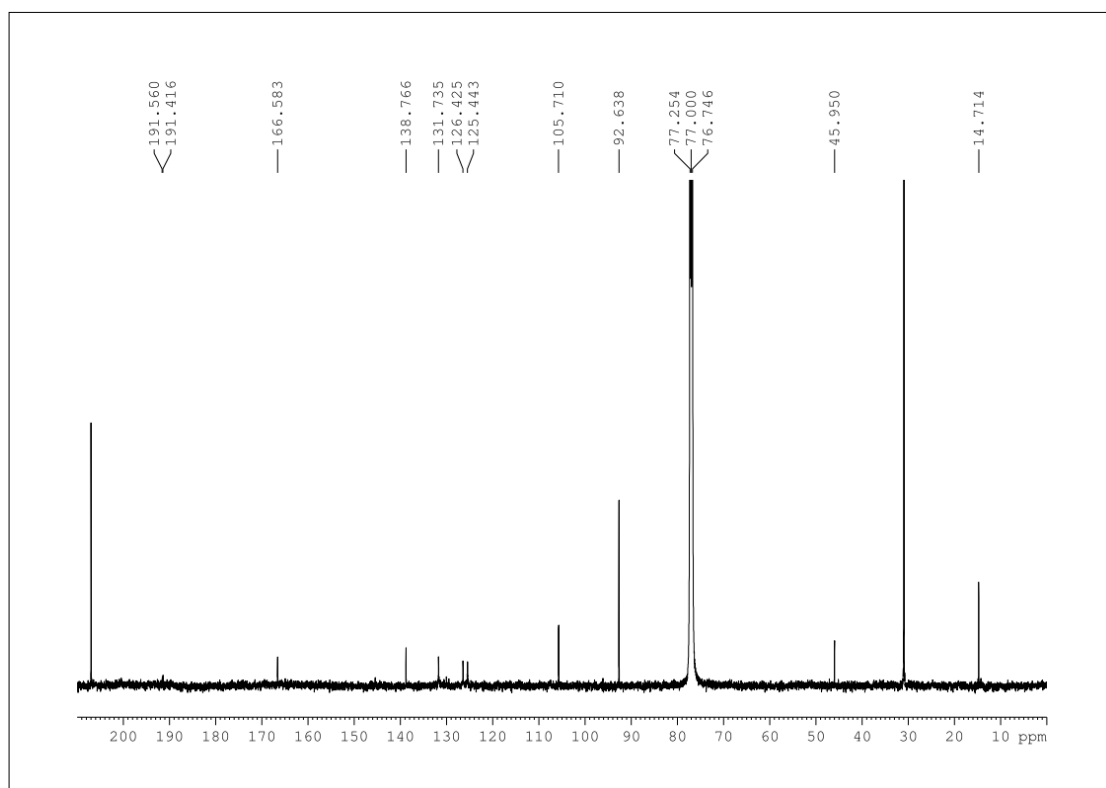

Figure S20 <sup>13</sup>C NMR spectrum of compound [4-(NiCpI)<sub>4</sub>] (100 MHz, CDCl<sub>3</sub>)

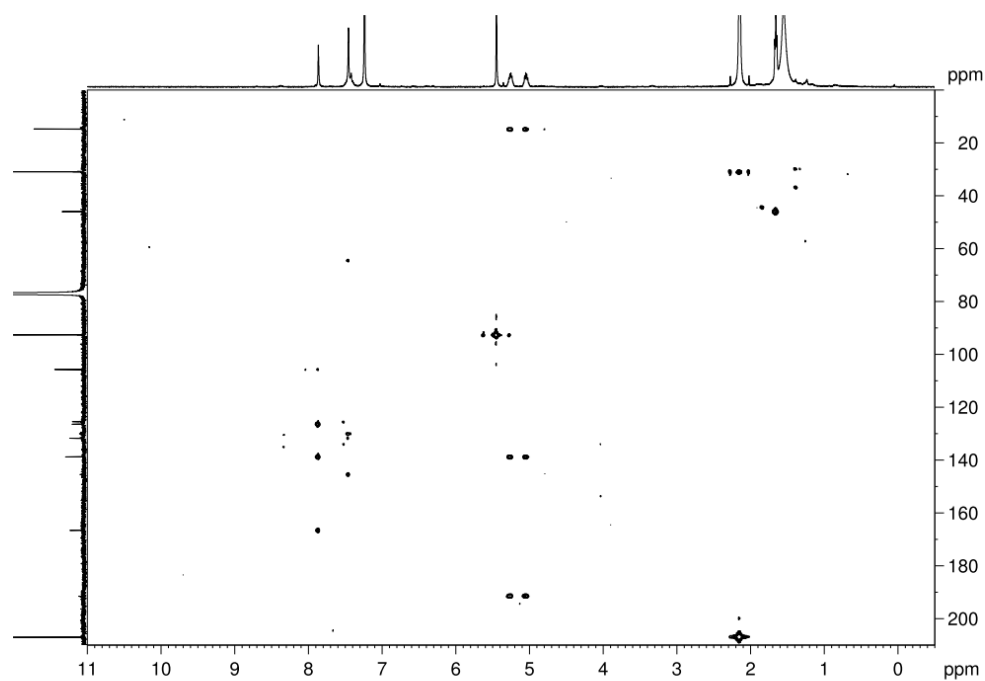

Figure S21 HMBC spectrum of compound **[4-(NiCpI)<sub>4</sub>]**

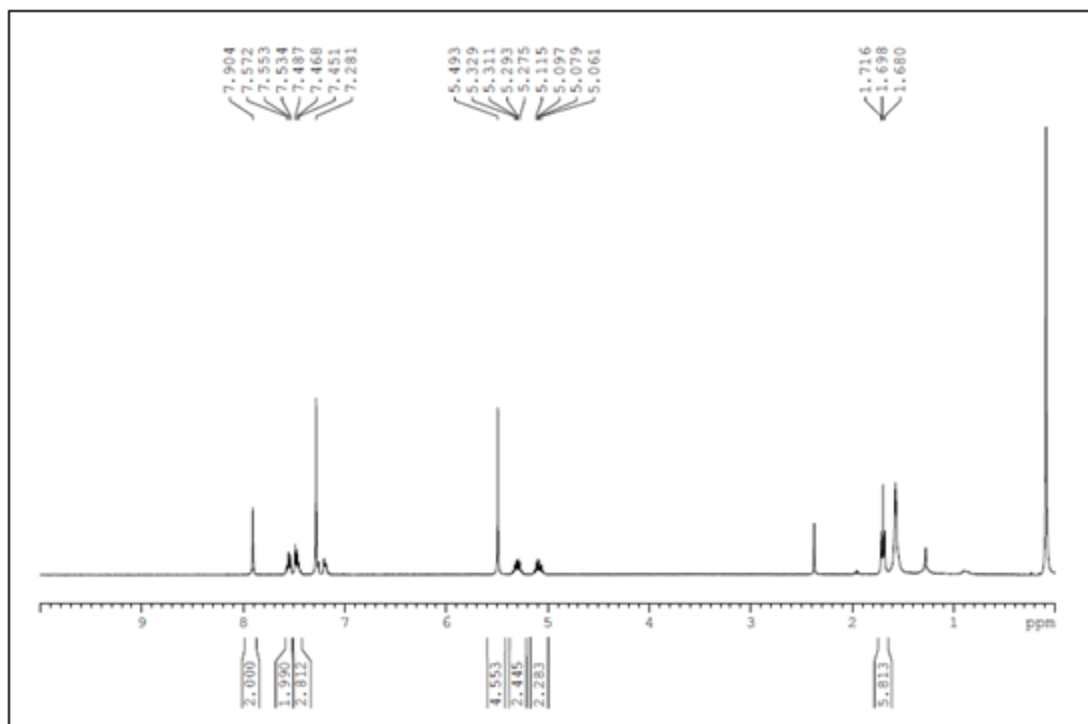

Figure S22 <sup>1</sup>H NMR spectrum of compound **[5-(NiCpI)]** (400 MHz, CDCl<sub>3</sub>)

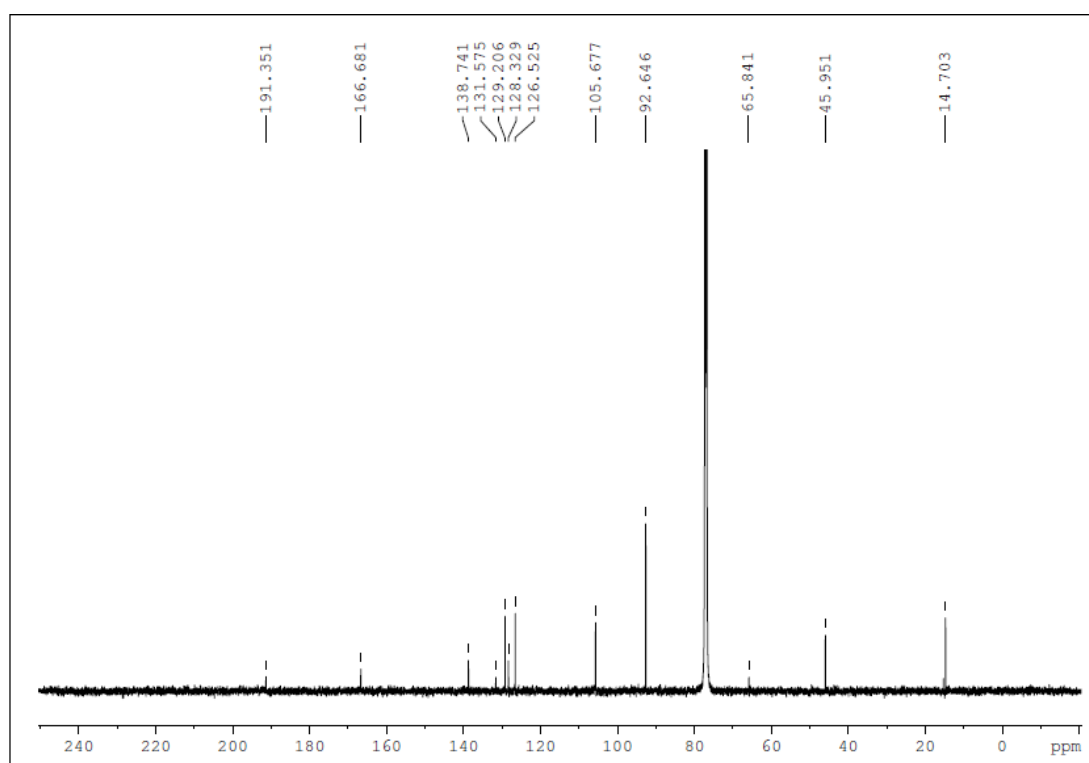

Figure S23  $^{13}\text{C}$  NMR spectrum of compound [5-(NiCpI)] (100 MHz,  $\text{CDCl}_3$ )

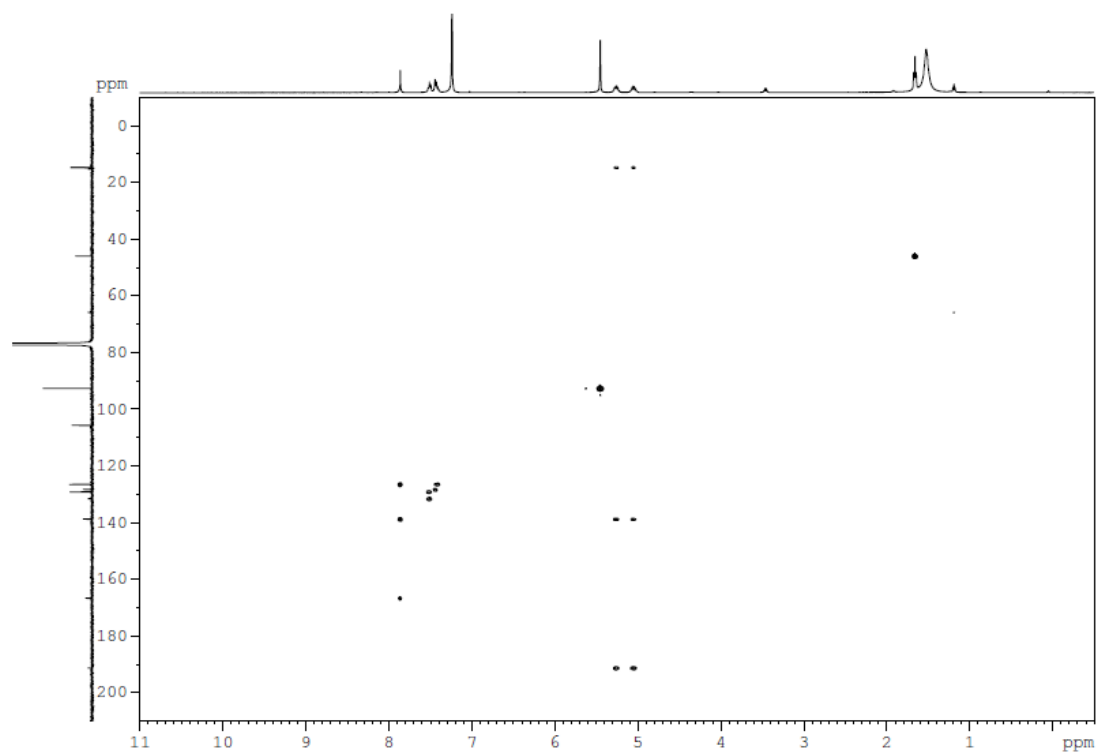

Figure S24 HMBC spectrum of compound [5-(NiCpI)]

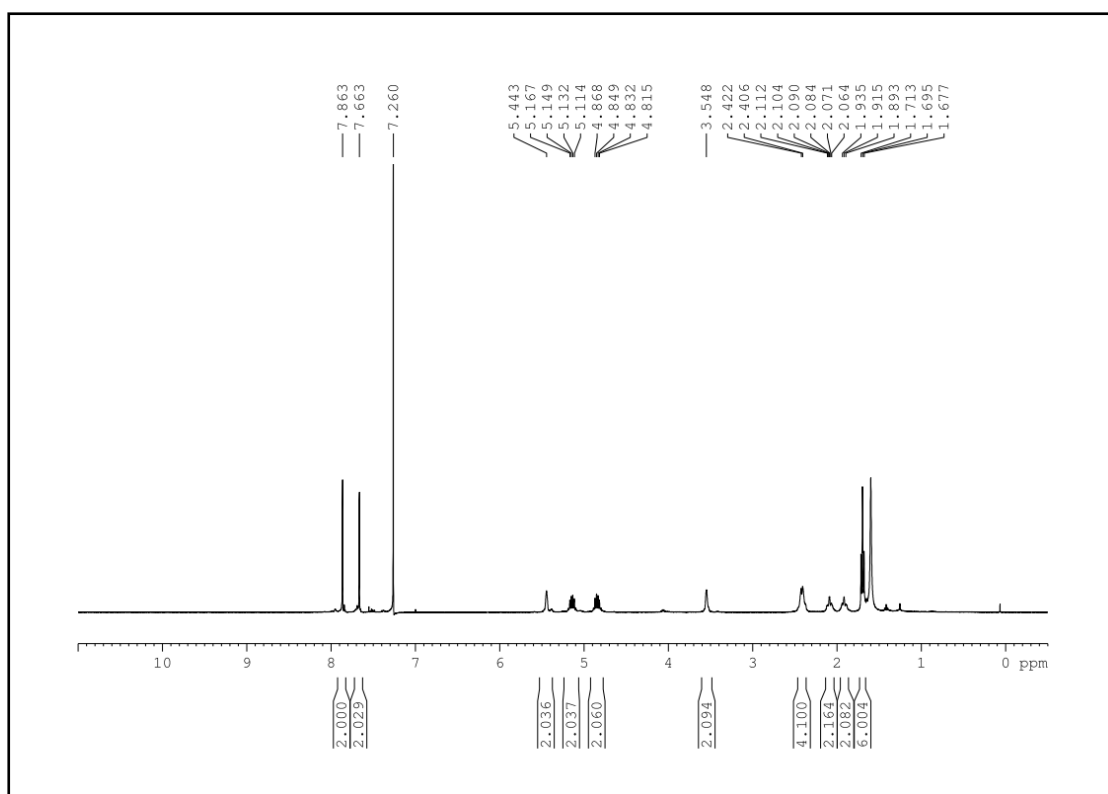

Figure S25 <sup>1</sup>H NMR spectrum of compound [2a-[Rh(COD)I]<sub>2</sub>] (400 MHz, CDCl<sub>3</sub>)

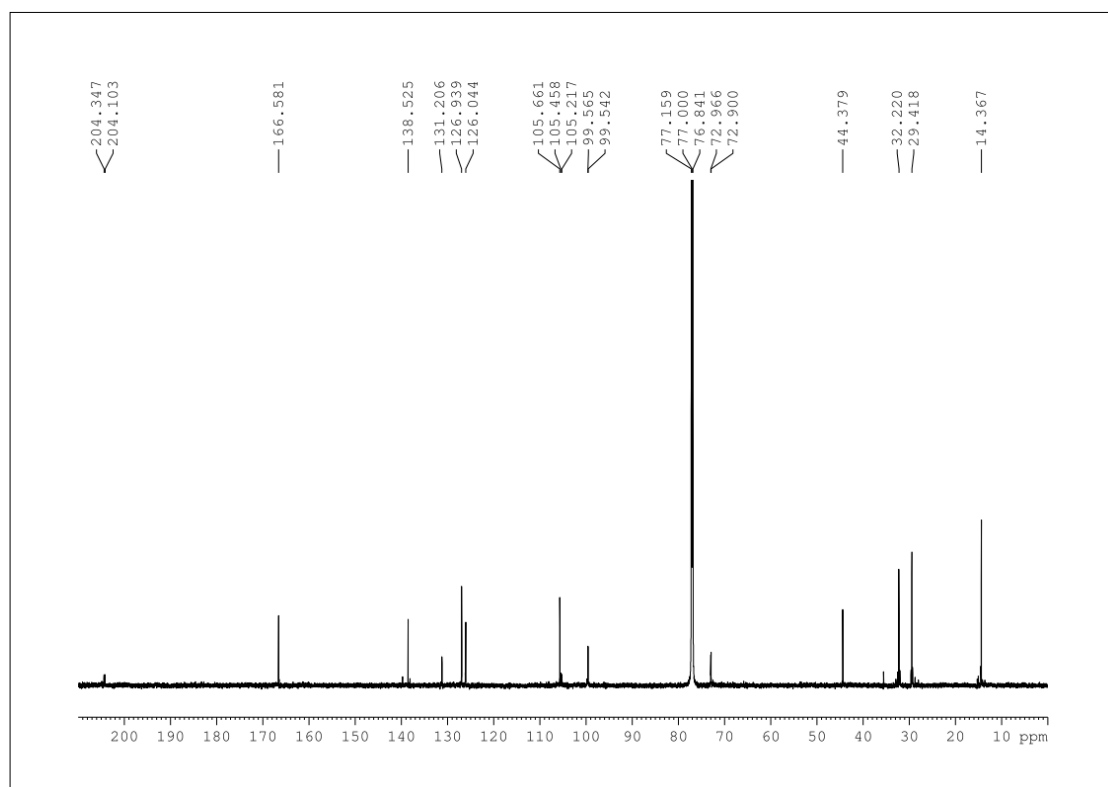

Figure S26 <sup>13</sup>C NMR spectrum of compound [2a-[Rh(COD)I]<sub>2</sub>] (100 MHz, CDCl<sub>3</sub>)

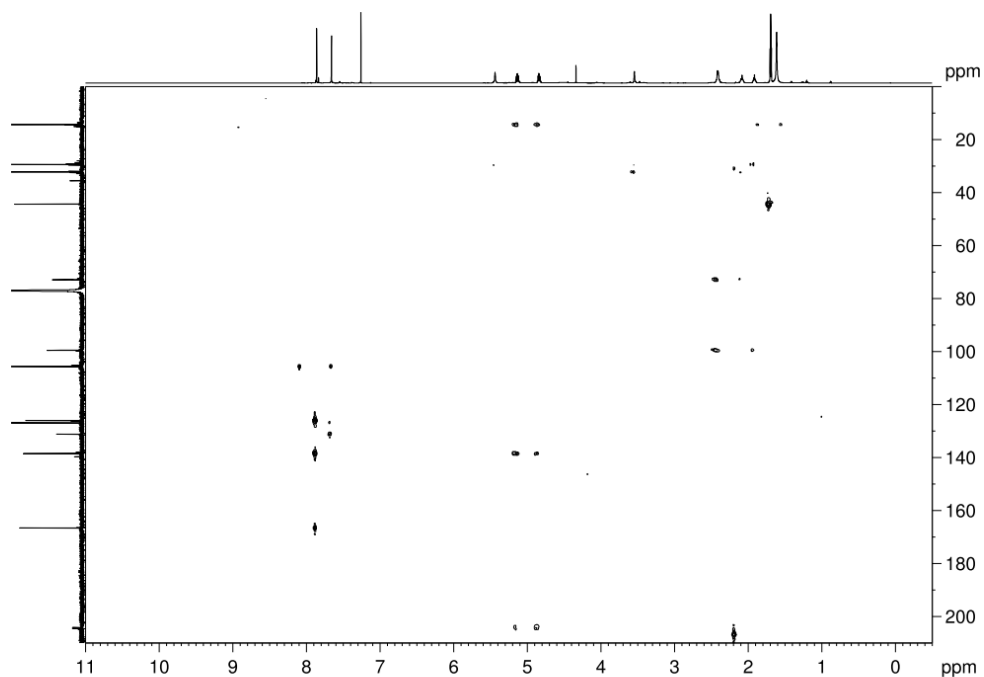

Figure S27 HMBC spectrum of compound **[2a- $[\text{Rh}(\text{COD})\text{I}]_2$ ]**

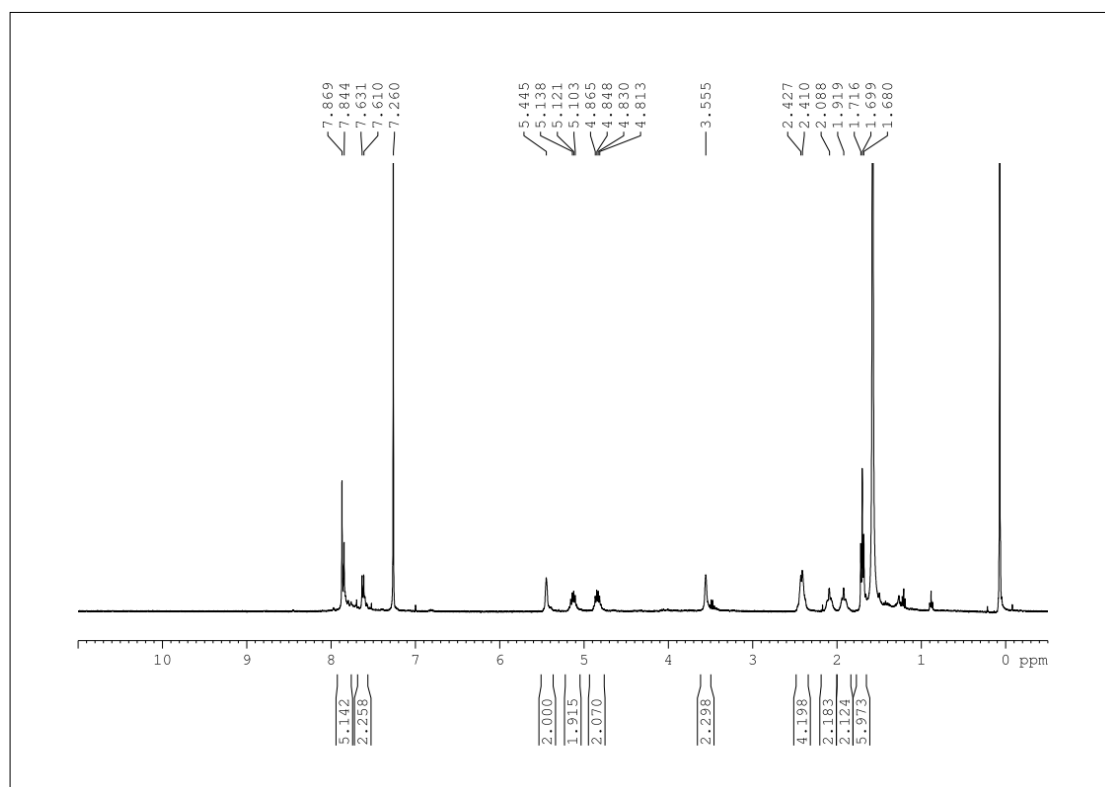

Figure S28  $^1\text{H}$  NMR spectrum of compound **[3- $[\text{Rh}(\text{COD})\text{I}]_3$ ]** (400 MHz,  $\text{CDCl}_3$ )

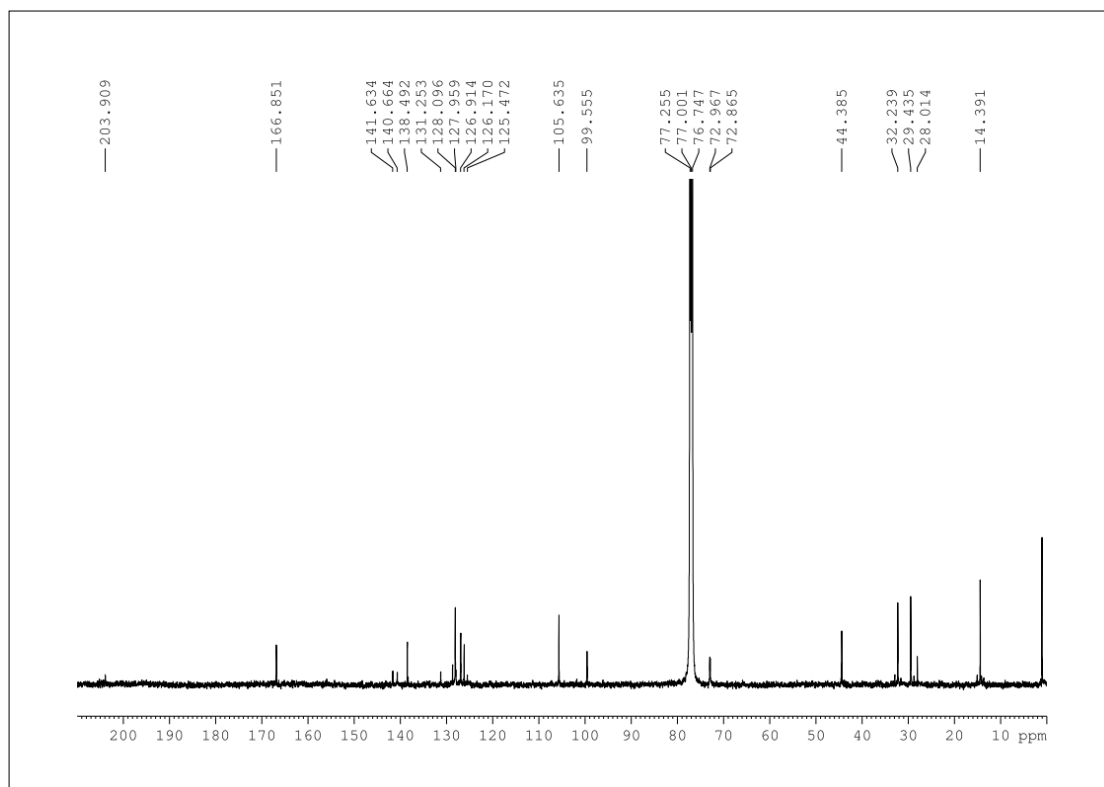

Figure S29 <sup>13</sup>C NMR spectrum of compound [3-[Rh(COD)I]<sub>3</sub>] (100 MHz, CDCl<sub>3</sub>)

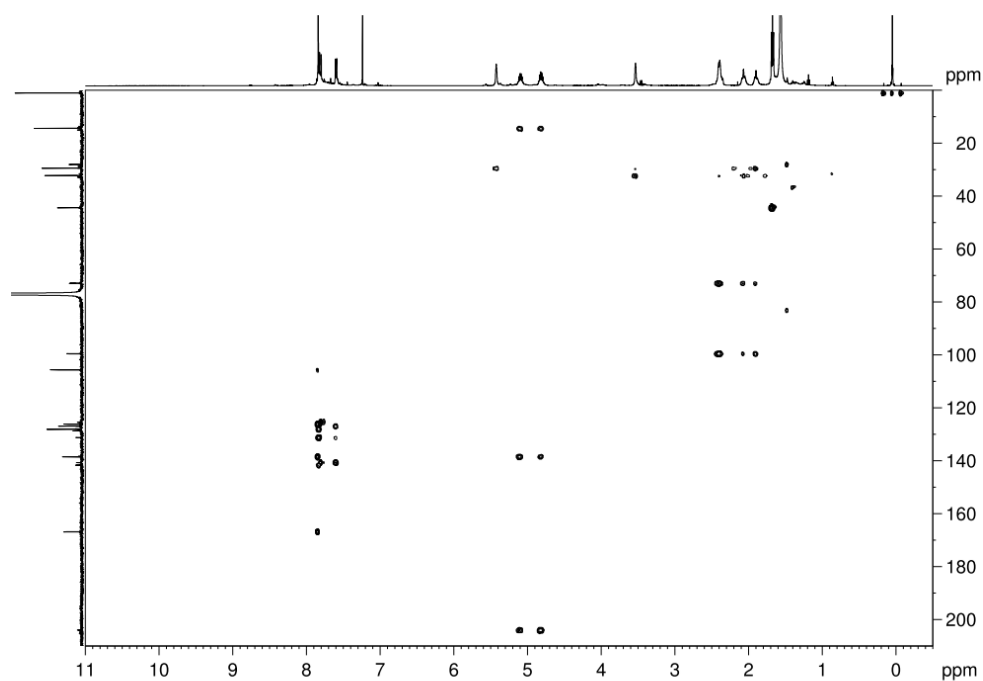

Figure S30 HMBC spectrum of compound [3-[Rh(COD)I]<sub>3</sub>]

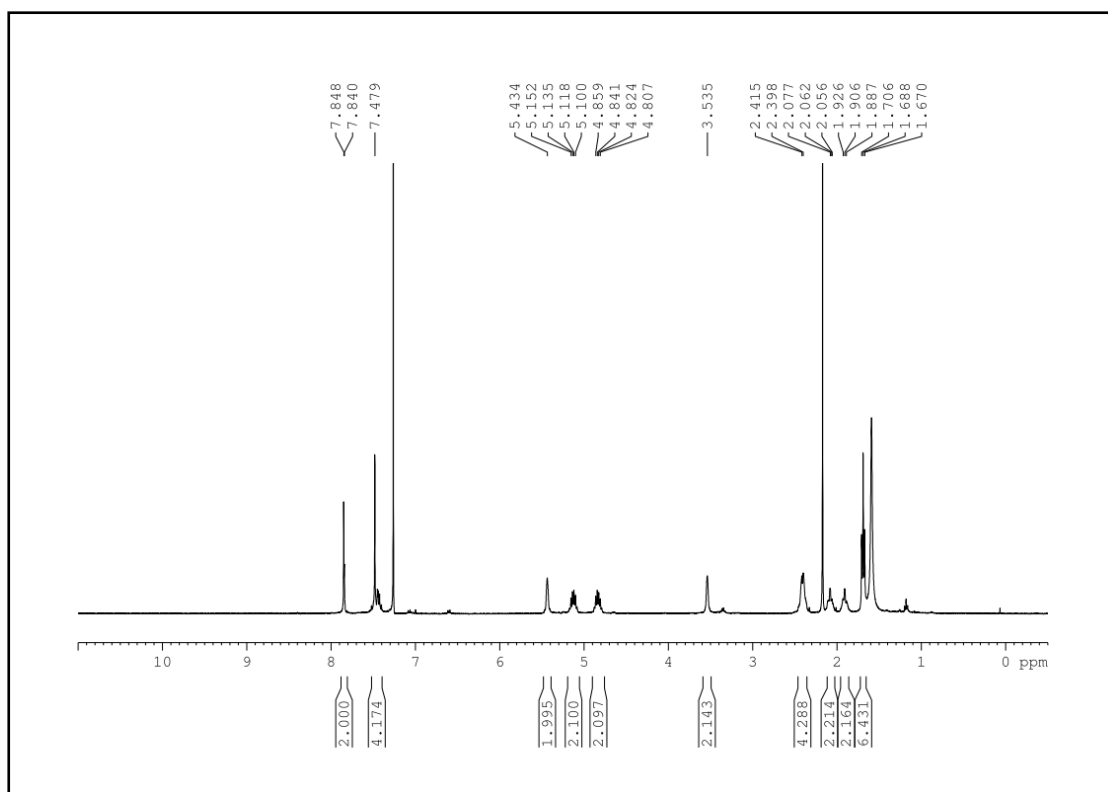

Figure S31 <sup>1</sup>H NMR spectrum of compound [4-[Rh(COD)I]<sub>4</sub>] (400 MHz, CDCl<sub>3</sub>)

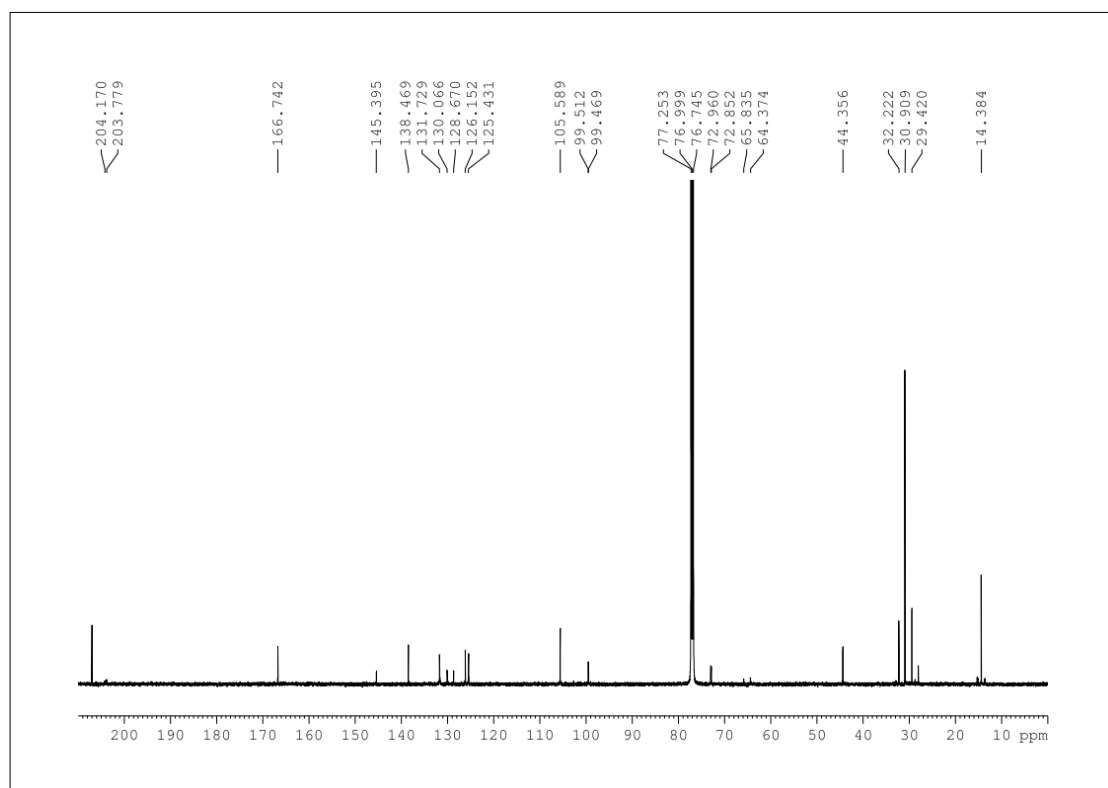

Figure S32 <sup>13</sup>C NMR spectrum of compound [4-[Rh(COD)I]<sub>4</sub>] (100 MHz, CDCl<sub>3</sub>)

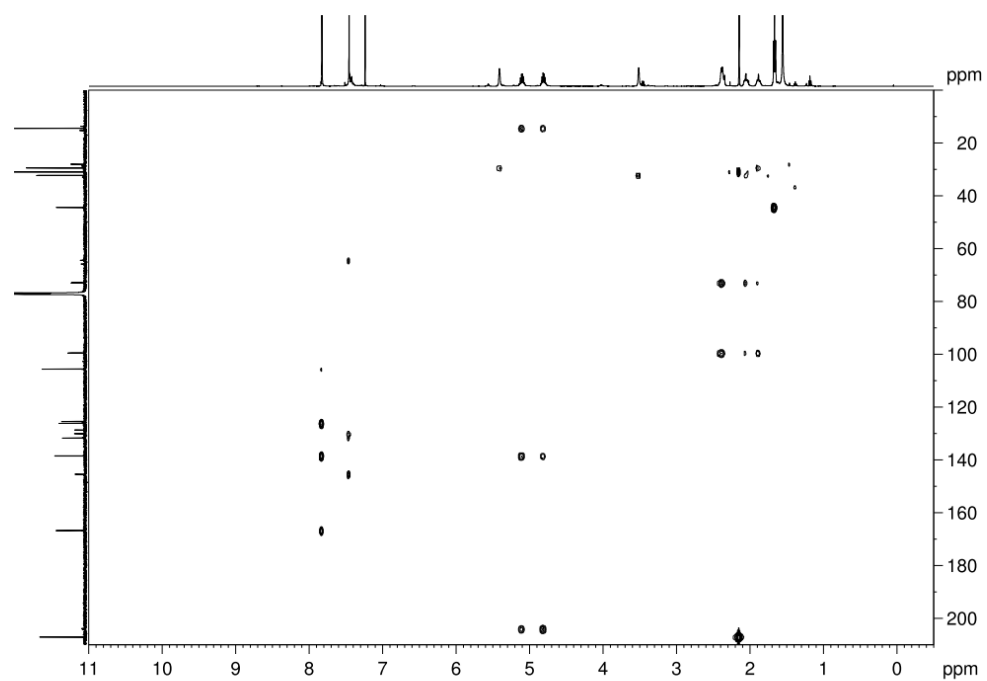

Figure S33 HMBC spectrum of compound **4**-[Rh(COD)I]<sub>4</sub>

## Mass Spectrum SmartFormula Report

### Analysis Info

Analysis Name D:\Data\Fish\MS20130307\_E-An\_pos\_low000002.d  
 Method tune\_low.m  
 Sample Name TuningMix 1:100  
 Comment

Acquisition Date 3/7/2013 4:27:15 PM

Operator BDAL@DE  
 Instrument / Ser# micrOTOF-Q 10183

### Acquisition Parameter

|             |          |                       |           |                  |           |
|-------------|----------|-----------------------|-----------|------------------|-----------|
| Source Type | ESI      | Ion Polarity          | Positive  | Set Nebulizer    | 0.4 Bar   |
| Focus       | Active   | Set Capillary         | 4500 V    | Set Dry Heater   | 180 °C    |
| Scan Begin  | 50 m/z   | Set End Plate Offset  | -500 V    | Set Dry Gas      | 4.0 l/min |
| Scan End    | 3000 m/z | Set Collision Cell RF | 150.0 Vpp | Set Divert Valve | Source    |

### +MS, 0.4-0.4min #(23-26)

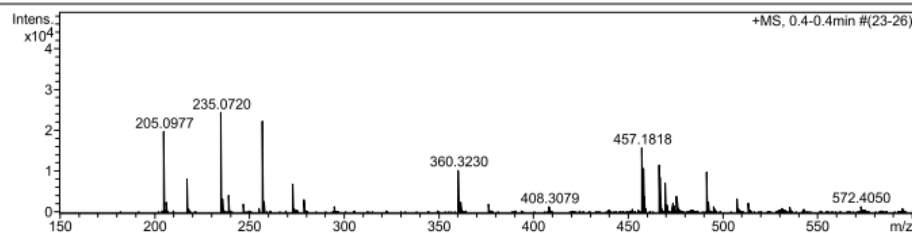

| Meas. m/z | # | Formula                                                      | Score  | m/z      | err [mDa] | err [ppm] | mSigma | rdb | e <sup>-</sup> Conf | N-Rule |
|-----------|---|--------------------------------------------------------------|--------|----------|-----------|-----------|--------|-----|---------------------|--------|
| 217.0605  | 1 | C <sub>11</sub> H <sub>9</sub> N <sub>2</sub> O <sub>3</sub> | 100.00 | 217.0608 | 0.3       | 1.4       | 9.9    | 8.5 | even                | ok     |

### +MS, 0.4-0.4min #(23-26)

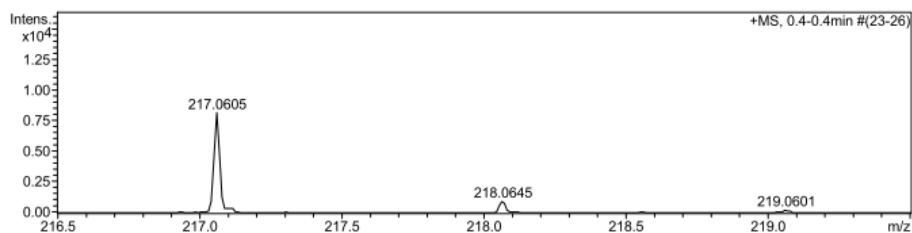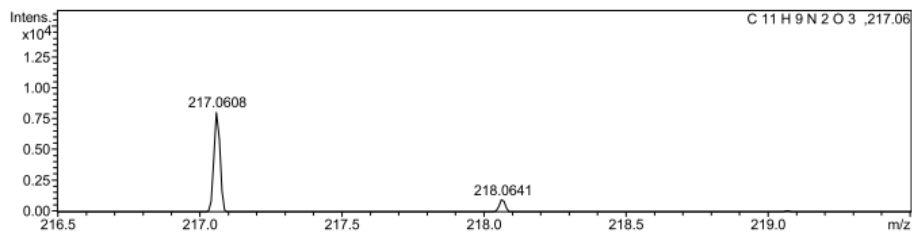

Figure S34 mass spectrum of compound **1**

## Mass Spectrum SmartFormula Report

### Analysis Info

Analysis Name D:\Data\Fish\MS20130227\_L5\_pos\_wide000002.d  
Method tune\_wide\_20130103.m  
Sample Name TuningMix 1:100  
Comment

Acquisition Date 2/27/2013 4:38:22 PM

Operator BDAL@DE  
Instrument / Ser# micrOTOF-Q 10183

### Acquisition Parameter

|             |          |                       |           |                  |           |
|-------------|----------|-----------------------|-----------|------------------|-----------|
| Source Type | ESI      | Ion Polarity          | Positive  | Set Nebulizer    | 0.4 Bar   |
| Focus       | Active   | Set Capillary         | 4500 V    | Set Dry Heater   | 180 °C    |
| Scan Begin  | 50 m/z   | Set End Plate Offset  | -500 V    | Set Dry Gas      | 4.0 l/min |
| Scan End    | 3000 m/z | Set Collision Cell RF | 600.0 Vpp | Set Divert Valve | Source    |

### +MS, 1.5min #89

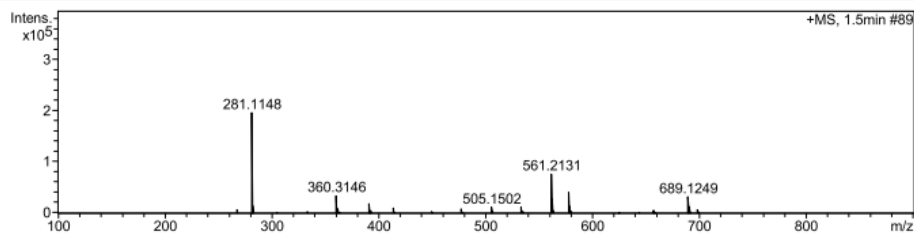

| Meas. m/z | # | Formula           | Score  | m/z      | err [mDa] | err [ppm] | mSigma | rdb  | e <sup>-</sup> Conf | N-Rule |
|-----------|---|-------------------|--------|----------|-----------|-----------|--------|------|---------------------|--------|
| 281.1148  | 1 | C 32 H 30 N 6 O 4 | 100.00 | 281.1159 | 1.1       | 3.9       | 9.4    | 21.0 | even                | ok     |

### +MS, 1.5min #89

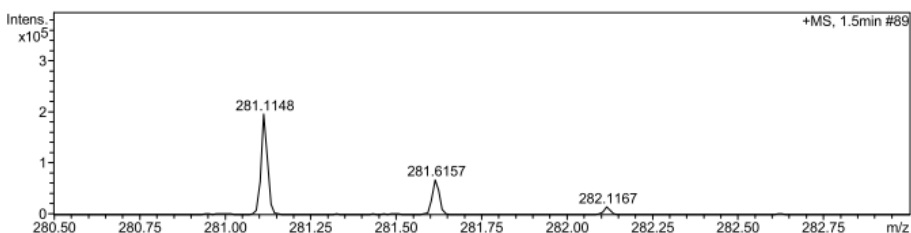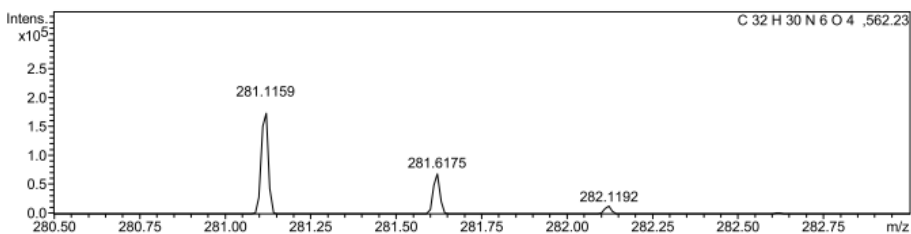

Figure S35 mass spectrum of compound [2a][I]<sub>2</sub>

## Mass Spectrum SmartFormula Report

### Analysis Info

Analysis Name D:\Data\Fish\MS20130308\_L7-5ul\_pos\_low000001.d  
 Method tune\_low.m  
 Sample Name TuningMix 1:100  
 Comment

Acquisition Date 3/8/2013 5:26:10 PM

Operator BDAL@DE  
 Instrument / Ser# micrOTOF-Q 10183

### Acquisition Parameter

|             |          |                       |           |                  |           |
|-------------|----------|-----------------------|-----------|------------------|-----------|
| Source Type | ESI      | Ion Polarity          | Positive  | Set Nebulizer    | 0.4 Bar   |
| Focus       | Active   | Set Capillary         | 4500 V    | Set Dry Heater   | 180 °C    |
| Scan Begin  | 50 m/z   | Set End Plate Offset  | -500 V    | Set Dry Gas      | 4.0 l/min |
| Scan End    | 3000 m/z | Set Collision Cell RF | 150.0 Vpp | Set Divert Valve | Source    |

### +MS, 0.4-0.4min #(23-25)

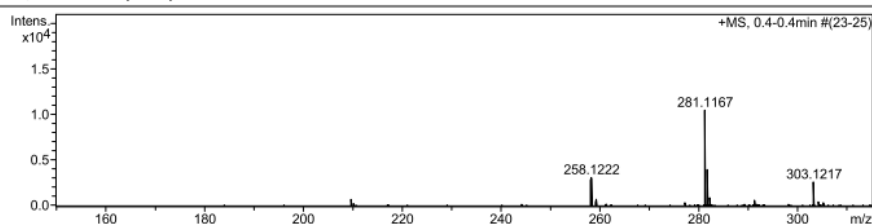

| Meas. m/z | # | Formula                                                       | Score  | m/z      | err [mDa] | err [ppm] | mSigma | rdb  | e <sup>-</sup> Conf | N-Rule |
|-----------|---|---------------------------------------------------------------|--------|----------|-----------|-----------|--------|------|---------------------|--------|
| 281.1167  | 1 | C <sub>32</sub> H <sub>30</sub> N <sub>6</sub> O <sub>4</sub> | 100.00 | 281.1159 | -0.9      | -3.1      | 37.6   | 21.0 | even                | ok     |

### +MS, 0.4-0.4min #(23-25)

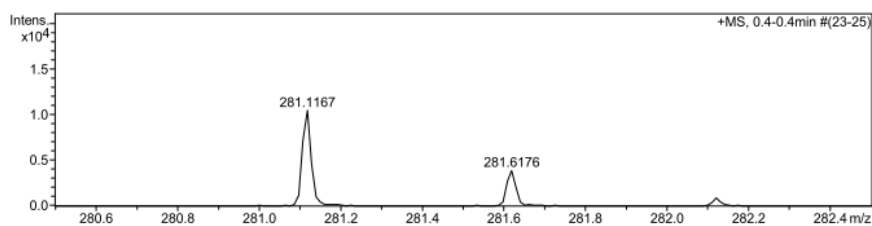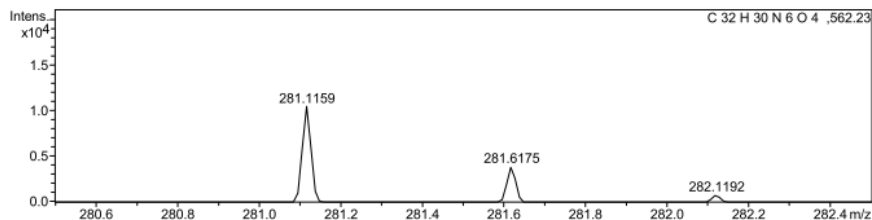

Fig

ure S36 mass spectrum of compound [2b][I]<sub>2</sub>

## Mass Spectrum SmartFormula Report

### Analysis Info

Analysis Name D:\Data\Fish\MS20130306\_L3\_pos\_wide000004.d  
 Method tune\_wide\_20130103.m  
 Sample Name TuningMix 1:100  
 Comment

Acquisition Date 3/6/2013 11:43:05 AM

Operator BDAL@DE  
 Instrument / Ser# micrOTOF-Q 10183

### Acquisition Parameter

|             |          |                       |           |                  |           |
|-------------|----------|-----------------------|-----------|------------------|-----------|
| Source Type | ESI      | Ion Polarity          | Positive  | Set Nebulizer    | 0.4 Bar   |
| Focus       | Active   | Set Capillary         | 4500 V    | Set Dry Heater   | 180 °C    |
| Scan Begin  | 50 m/z   | Set End Plate Offset  | -500 V    | Set Dry Gas      | 4.0 l/min |
| Scan End    | 3000 m/z | Set Collision Cell RF | 600.0 Vpp | Set Divert Valve | Source    |

### +MS, 0.7-0.7min #(40-43)

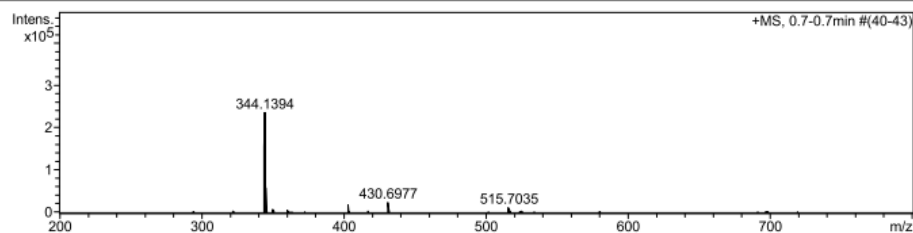

| Meas. m/z | # | Formula           | Score  | m/z      | err [mDa] | err [ppm] | mSigma | rdb  | e <sup>-</sup> | Conf | N-Rule |
|-----------|---|-------------------|--------|----------|-----------|-----------|--------|------|----------------|------|--------|
| 344.1394  | 1 | C 63 H 54 N 9 O 6 | 100.00 | 344.1394 | -0.1      | -0.2      | 22.2   | 41.5 | even           |      | ok     |

### +MS, 0.7-0.7min #(40-43)

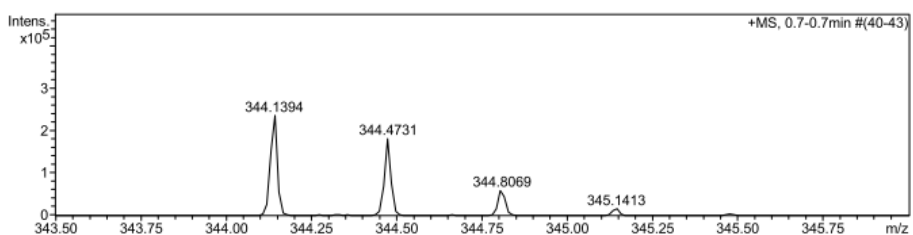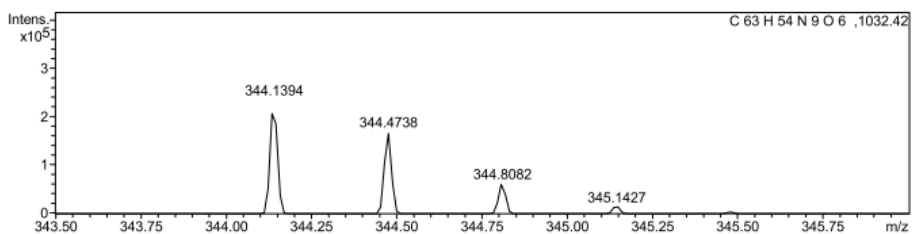

Figure S37 mass spectrum of compound [3][I]<sub>3</sub>

## Mass Spectrum SmartFormula Report

### Analysis Info

Analysis Name D:\Data\Fish\MS20130306\_L2\_pos\_wide000001.d  
 Method tune\_wide\_20130103.m  
 Sample Name TuningMix 1:100  
 Comment

Acquisition Date 3/6/2013 11:03:26 AM

Operator BDAL@DE  
 Instrument / Ser# micrOTOF-Q 10183

### Acquisition Parameter

|             |          |                       |           |                  |           |
|-------------|----------|-----------------------|-----------|------------------|-----------|
| Source Type | ESI      | Ion Polarity          | Positive  | Set Nebulizer    | 0.4 Bar   |
| Focus       | Active   | Set Capillary         | 4500 V    | Set Dry Heater   | 180 °C    |
| Scan Begin  | 50 m/z   | Set End Plate Offset  | -500 V    | Set Dry Gas      | 4.0 l/min |
| Scan End    | 3000 m/z | Set Collision Cell RF | 600.0 Vpp | Set Divert Valve | Source    |

### +MS, 0.8-0.9min #(47-53)

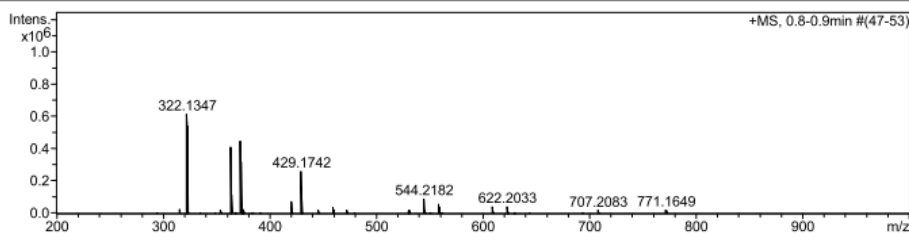

| Meas. m/z | # | Formula              | Score  | m/z      | err [mDa] | err [ppm] | mSigma | rdb  | e <sup>-</sup> | Conf | N-Rule |
|-----------|---|----------------------|--------|----------|-----------|-----------|--------|------|----------------|------|--------|
| 471.8111  | 1 | C 77 H 68 I N 12 O 8 | 100.00 | 471.8104 | -0.7      | -1.6      | 5.9    | 49.5 | even           |      | ok     |

### +MS, 0.8-0.9min #(47-53)

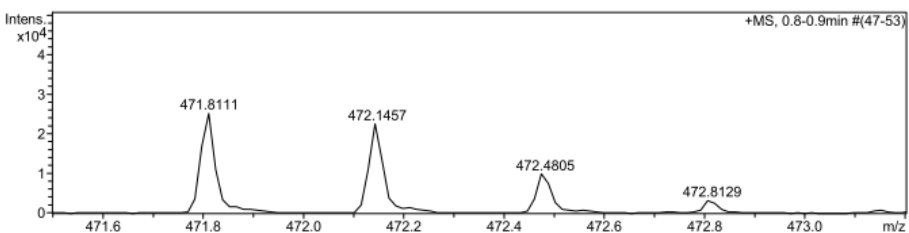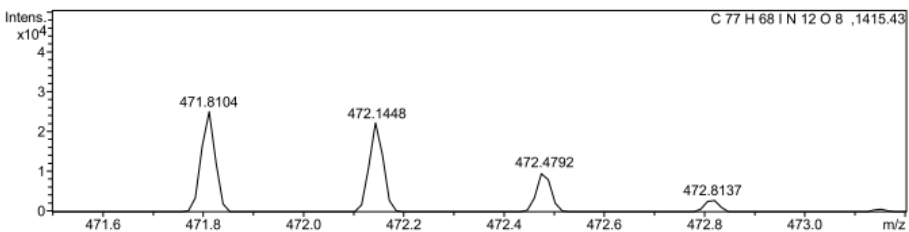

Figure S38 mass spectrum of compound [4][I]<sub>4</sub>

## Mass Spectrum SmartFormula Report

### Analysis Info

Analysis Name D:\Data\Fish\MS20140116\_L9\_pos\_low000003.d  
Method tune\_low.m  
Sample Name  
Comment

Acquisition Date 1/16/2014 10:34:58 AM

Operator BDAL@DE  
Instrument / Ser# micrOTOF-Q 10183

### Acquisition Parameter

|             |          |                       |           |                  |           |
|-------------|----------|-----------------------|-----------|------------------|-----------|
| Source Type | ESI      | Ion Polarity          | Positive  | Set Nebulizer    | 0.2 Bar   |
| Focus       | Active   | Set Capillary         | 4500 V    | Set Dry Heater   | 180 °C    |
| Scan Begin  | 50 m/z   | Set End Plate Offset  | -500 V    | Set Dry Gas      | 4.0 l/min |
| Scan End    | 1300 m/z | Set Collision Cell RF | 150.0 Vpp | Set Divert Valve | Source    |

### +MS, 0.0-2.0min #(2-120)

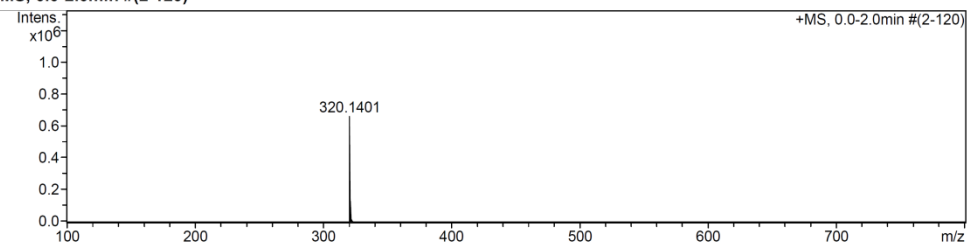

| Meas. m/z | # | Formula                                                       | Score  | m/z      | err [mDa] | err [ppm] | mSigma | e <sup>-</sup> Conf | rdb  | N-Rule |
|-----------|---|---------------------------------------------------------------|--------|----------|-----------|-----------|--------|---------------------|------|--------|
| 320.1401  | 1 | C <sub>19</sub> H <sub>18</sub> N <sub>3</sub> O <sub>2</sub> | 100.00 | 320.1394 | -0.7      | -2.2      | 11.3   | even                | 12.5 | ok     |

### +MS, 0.0-2.0min #(2-120)

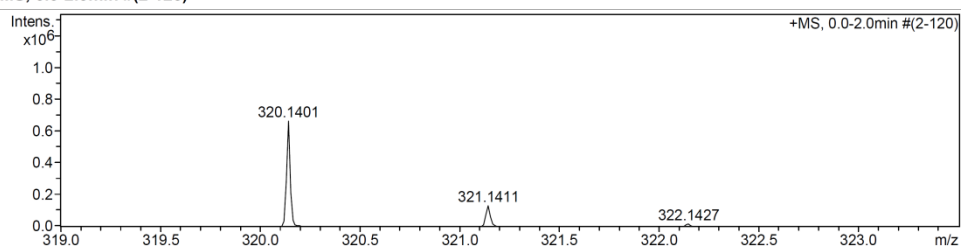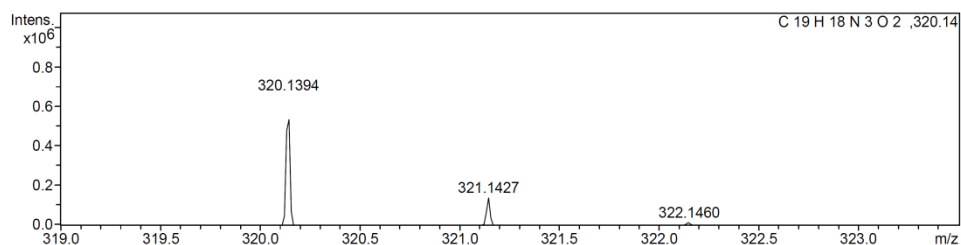

Figure S39 mass spectrum of compound [5][I]

## Mass Spectrum SmartFormula Report

### Analysis Info

Analysis Name D:\Data\Fish\MS20130308\_L5Ni\_pos\_wide000001.d  
 Method tune\_wide\_20130103.m  
 Sample Name TuningMix 1:100  
 Comment

Acquisition Date 3/8/2013 10:04:29 AM

Operator BDAL@DE  
 Instrument / Ser# micrOTOF-Q 10183

### Acquisition Parameter

|             |          |                       |           |                  |           |
|-------------|----------|-----------------------|-----------|------------------|-----------|
| Source Type | ESI      | Ion Polarity          | Positive  | Set Nebulizer    | 0.4 Bar   |
| Focus       | Active   | Set Capillary         | 4500 V    | Set Dry Heater   | 180 °C    |
| Scan Begin  | 50 m/z   | Set End Plate Offset  | -500 V    | Set Dry Gas      | 4.0 l/min |
| Scan End    | 3000 m/z | Set Collision Cell RF | 600.0 Vpp | Set Divert Valve | Source    |

### +MS, 1.0-1.0min #(57-58)

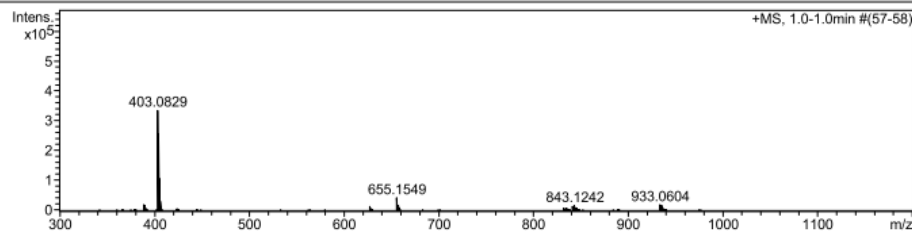

| Meas. m/z | # | Formula                | Score  | m/z      | err [mDa] | err [ppm] | mSigma | rdB  | e <sup>-</sup> Conf | N-Rule |
|-----------|---|------------------------|--------|----------|-----------|-----------|--------|------|---------------------|--------|
| 403.0829  | 1 | C 42 H 38 N 6 Ni 2 O 4 | 100.00 | 403.0825 | -0.4      | -1.0      | 48.5   | 27.0 | even                | ok     |

### +MS, 1.0-1.0min #(57-58)

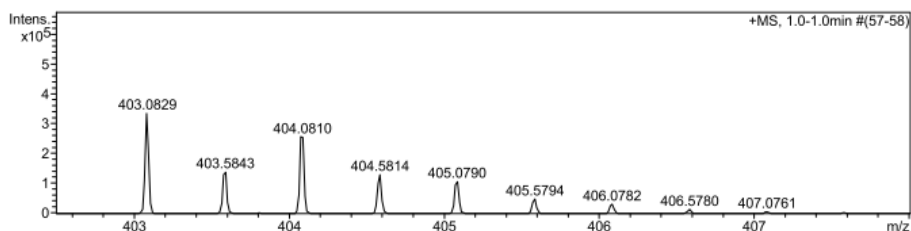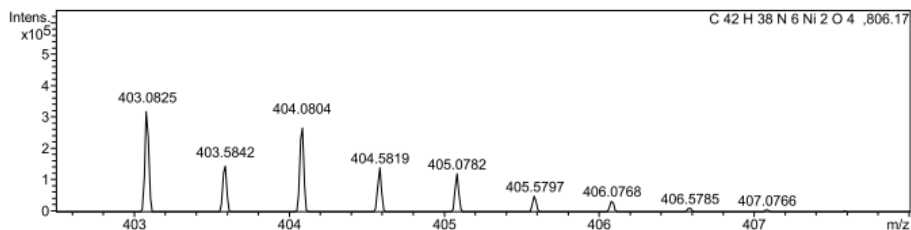

Figure S40 mass spectrum of compound [2a-(NiCpI)<sub>2</sub>]

## Mass Spectrum SmartFormula Report

### Analysis Info

Analysis Name D:\Data\Fish\MS20130308\_L3Ni\_pos\_wide000001.d  
 Method tune\_wide\_20130103.m  
 Sample Name TuningMix 1:100  
 Comment

Acquisition Date 3/8/2013 3:09:44 PM

Operator BDAL@DE  
 Instrument / Ser# micrOTOF-Q 10183

### Acquisition Parameter

|             |          |                       |           |                  |           |
|-------------|----------|-----------------------|-----------|------------------|-----------|
| Source Type | ESI      | Ion Polarity          | Positive  | Set Nebulizer    | 0.4 Bar   |
| Focus       | Active   | Set Capillary         | 4500 V    | Set Dry Heater   | 180 °C    |
| Scan Begin  | 50 m/z   | Set End Plate Offset  | -500 V    | Set Dry Gas      | 4.0 l/min |
| Scan End    | 3000 m/z | Set Collision Cell RF | 600.0 Vpp | Set Divert Valve | Source    |

### +MS, 1.6-1.6min #(95-96)

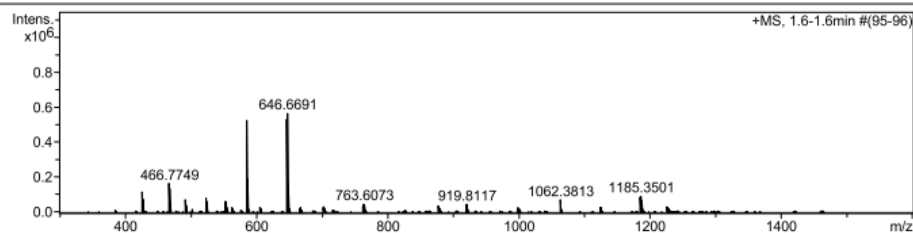

| Meas. m/z | # | Formula                  | Score  | m/z      | err [mDa] | err [ppm] | mSigma | rdb  | e <sup>-</sup> Conf | N-Rule |
|-----------|---|--------------------------|--------|----------|-----------|-----------|--------|------|---------------------|--------|
| 762.6084  | 1 | C 78 H 66 I N 9 Ni 3 O 6 | 100.00 | 762.6115 | 3.1       | 4.1       | 19.1   | 50.0 | even                | ok     |

### +MS, 1.6-1.6min #(95-96)

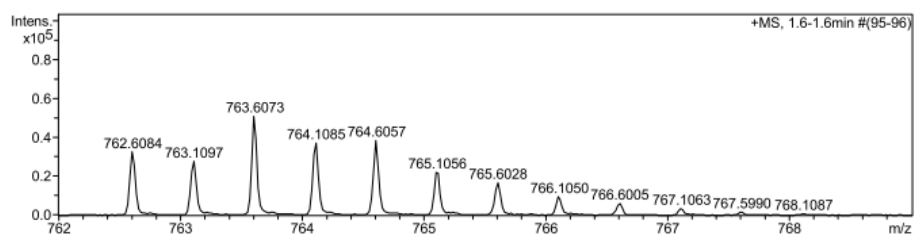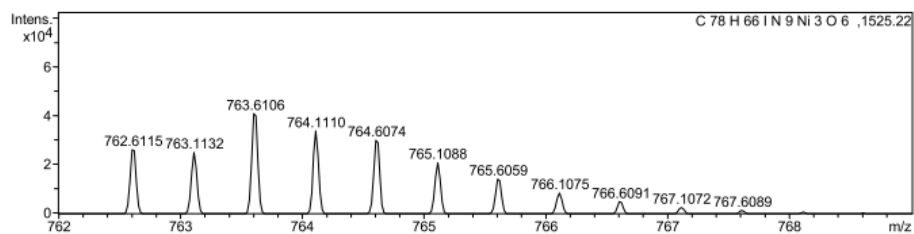

Figure S41 mass spectrum of compound [3-(NiCpI)<sub>3</sub>]

## Mass Spectrum SmartFormula Report

### Analysis Info

Analysis Name D:\Data\Fish\MS20130308\_L2Ni\_pos\_wide000001.d  
 Method tune\_wide\_20130103.m  
 Sample Name TuningMix 1:100  
 Comment

Acquisition Date 3/8/2013 10:36:25 AM

Operator BDAL@DE  
 Instrument / Ser# micrOTOF-Q 10183

### Acquisition Parameter

|             |          |                       |           |                  |           |
|-------------|----------|-----------------------|-----------|------------------|-----------|
| Source Type | ESI      | Ion Polarity          | Positive  | Set Nebulizer    | 0.4 Bar   |
| Focus       | Active   | Set Capillary         | 4500 V    | Set Dry Heater   | 180 °C    |
| Scan Begin  | 50 m/z   | Set End Plate Offset  | -500 V    | Set Dry Gas      | 4.0 l/min |
| Scan End    | 3000 m/z | Set Collision Cell RF | 600.0 Vpp | Set Divert Valve | Source    |

### +MS, 0.6-0.6min #(35-37)

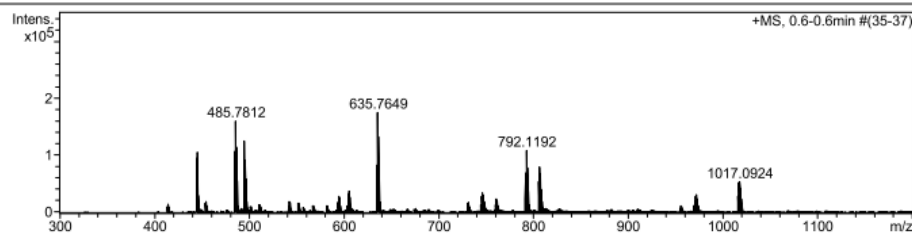

| Meas. m/z | # | Formula                                                                         | Score  | m/z      | err [mDa] | err [ppm] | mSigma | rdb  | e <sup>-</sup> | Conf | N-Rule |
|-----------|---|---------------------------------------------------------------------------------|--------|----------|-----------|-----------|--------|------|----------------|------|--------|
| 634.4326  | 1 | C <sub>97</sub> H <sub>84</sub> I <sub>N</sub> 12Ni <sub>4</sub> O <sub>8</sub> | 100.00 | 634.4326 | -0.0      | -0.1      | 39.2   | 61.5 | even           |      | ok     |

### +MS, 0.6-0.6min #(35-37)

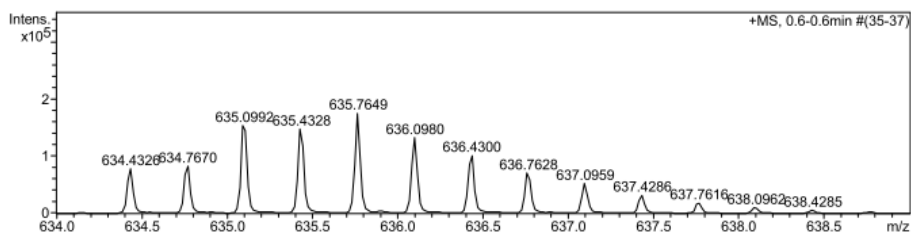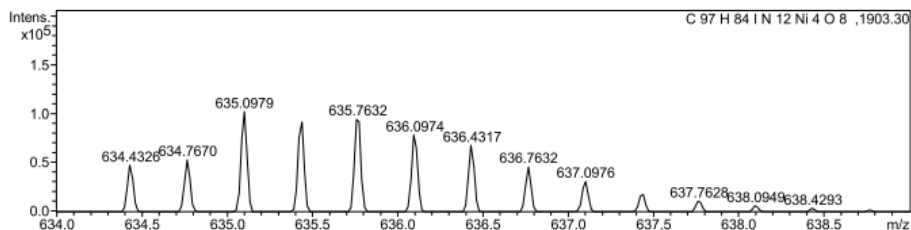

Figure S42 mass spectrum of compound [4-(NiCpI)<sub>4</sub>]

## Mass Spectrum SmartFormula Report

### Analysis Info

Analysis Name D:\Data\Fish\MS20140116\_L9Ni\_pos\_low000001.d  
Method tune\_low.m  
Sample Name  
Comment

Acquisition Date 1/16/2014 10:09:28 AM

Operator BDAL@DE  
Instrument / Ser# micrOTOF-Q 10183

### Acquisition Parameter

|             |          |                       |           |                  |           |
|-------------|----------|-----------------------|-----------|------------------|-----------|
| Source Type | ESI      | Ion Polarity          | Positive  | Set Nebulizer    | 0.2 Bar   |
| Focus       | Active   | Set Capillary         | 4500 V    | Set Dry Heater   | 180 °C    |
| Scan Begin  | 50 m/z   | Set End Plate Offset  | -500 V    | Set Dry Gas      | 4.0 l/min |
| Scan End    | 1300 m/z | Set Collision Cell RF | 150.0 Vpp | Set Divert Valve | Source    |

### +MS, 0.0-2.0min #(2-120)

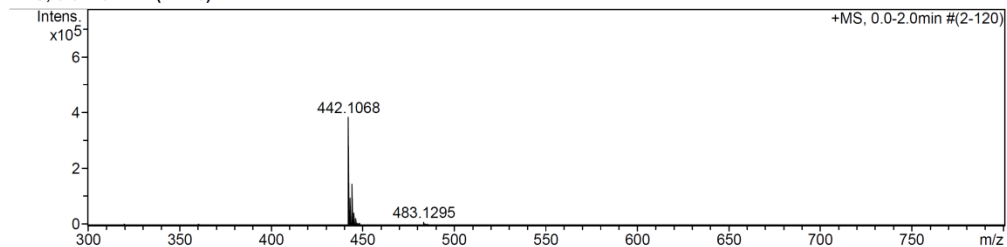

| Meas. m/z | # | Formula                                                         | m/z      | Score  | err [mDa] | err [ppm] | mSigma | e <sup>-</sup> Conf | rdb  | N-Rule |
|-----------|---|-----------------------------------------------------------------|----------|--------|-----------|-----------|--------|---------------------|------|--------|
| 442.1068  | 1 | C <sub>24</sub> H <sub>22</sub> N <sub>3</sub> NiO <sub>2</sub> | 442.1060 | 100.00 | -0.8      | -1.9      | 19.1   | even                | 15.5 | ok     |

### +MS, 0.0-2.0min #(2-120)

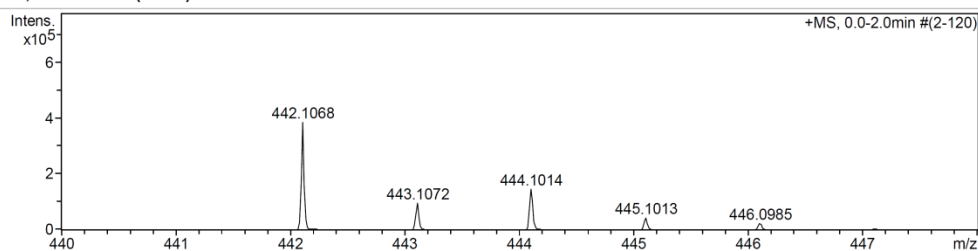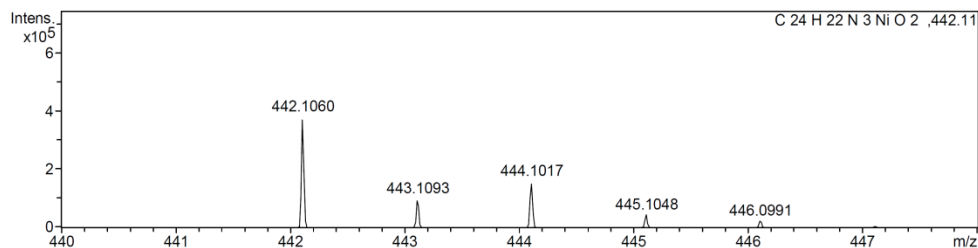

Figure S43 mass spectrum of compound [5-(NiCpI)]

## Mass Spectrum SmartFormula Report

### Analysis Info

Analysis Name D:\Data\Fish\MS20130308\_L5Rh\_pos\_wide000001.d  
 Method tune\_wide\_20130103.m  
 Sample Name TuningMix 1:100  
 Comment

Acquisition Date 3/8/2013 12:07:27 PM

Operator BDAL@DE  
 Instrument / Ser# micrOTOF-Q 10183

### Acquisition Parameter

|             |          |                       |           |                  |           |
|-------------|----------|-----------------------|-----------|------------------|-----------|
| Source Type | ESI      | Ion Polarity          | Positive  | Set Nebulizer    | 0.4 Bar   |
| Focus       | Active   | Set Capillary         | 4500 V    | Set Dry Heater   | 180 °C    |
| Scan Begin  | 50 m/z   | Set End Plate Offset  | -500 V    | Set Dry Gas      | 4.0 l/min |
| Scan End    | 3000 m/z | Set Collision Cell RF | 600.0 Vpp | Set Divert Valve | Source    |

### +MS, 0.4-0.4min #(21-25)

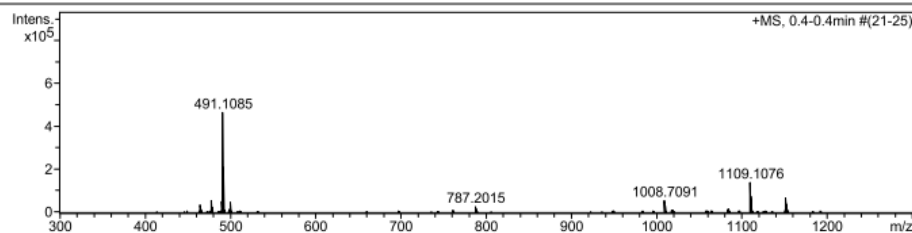

| Meas. m/z | # | Formula                | Score  | m/z      | err [mDa] | err [ppm] | mSigma | rdb  | e <sup>-</sup> Conf | N-Rule |
|-----------|---|------------------------|--------|----------|-----------|-----------|--------|------|---------------------|--------|
| 491.1085  | 1 | C 48 H 52 N 6 O 4 Rh 2 | 100.00 | 491.1075 | -1.0      | -2.1      | 48.0   | 27.0 | even                | ok     |

### +MS, 0.4-0.4min #(21-25)

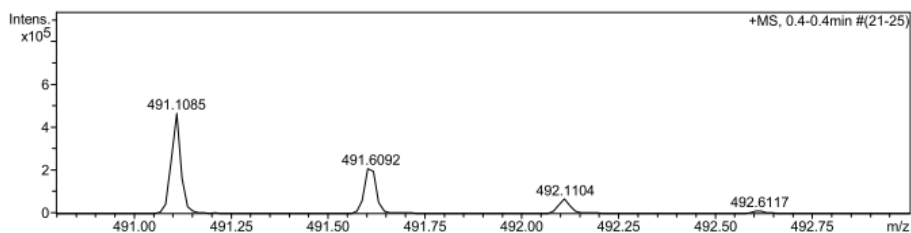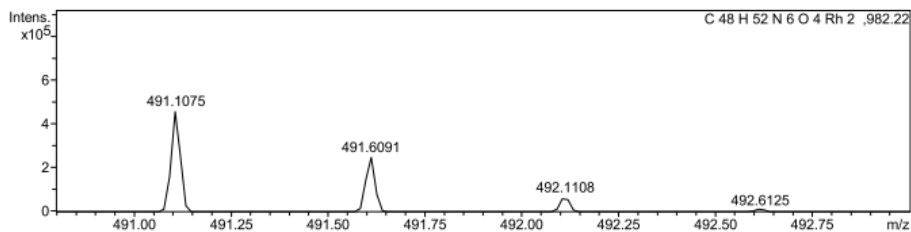

Figure S44 mass spectrum of compound [2a-[Rh(COD)I]<sub>2</sub>]

## Mass Spectrum SmartFormula Report

### Analysis Info

Analysis Name D:\Data\Fish\MS20130308\_L3Rh\_pos\_wide000001.d  
 Method tune\_wide\_20130103.m  
 Sample Name TuningMix 1:100  
 Comment

Acquisition Date 3/8/2013 11:41:58 AM

Operator BDAL@DE  
 Instrument / Ser# micrOTOF-Q 10183

### Acquisition Parameter

|             |          |                       |           |                  |           |
|-------------|----------|-----------------------|-----------|------------------|-----------|
| Source Type | ESI      | Ion Polarity          | Positive  | Set Nebulizer    | 0.4 Bar   |
| Focus       | Active   | Set Capillary         | 4500 V    | Set Dry Heater   | 180 °C    |
| Scan Begin  | 50 m/z   | Set End Plate Offset  | -500 V    | Set Dry Gas      | 4.0 l/min |
| Scan End    | 3000 m/z | Set Collision Cell RF | 600.0 Vpp | Set Divert Valve | Source    |

### +MS, 1.3-1.3min #(77-79)

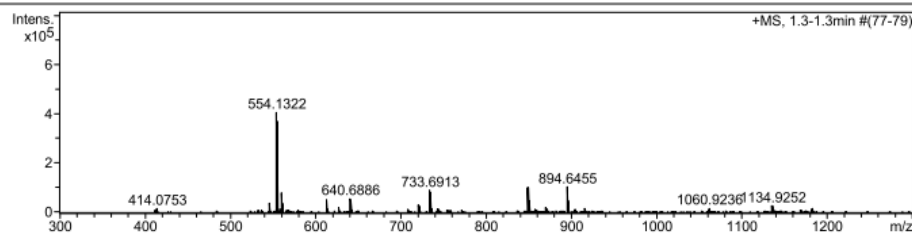

| Meas. m/z | # | Formula                  | Score  | m/z      | err [mDa] | err [ppm] | mSigma | rdb  | e <sup>-</sup> Conf | N-Rule |
|-----------|---|--------------------------|--------|----------|-----------|-----------|--------|------|---------------------|--------|
| 554.1322  | 1 | C 87 H 87 N 9 O 6 Rh 3   | 100.00 | 554.1309 | -1.2      | -2.2      | 45.3   | 50.5 | even                | ok     |
| 894.6455  | 1 | C 87 H 87 I N 9 O 6 Rh 3 | 100.00 | 894.6489 | 3.4       | 3.8       | 36.5   | 50.0 | even                | ok     |

### +MS, 1.3-1.3min #(77-79)

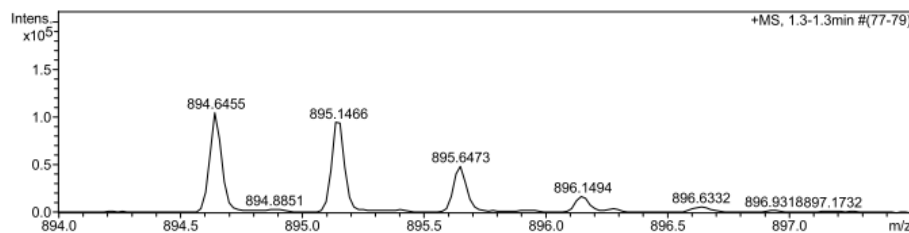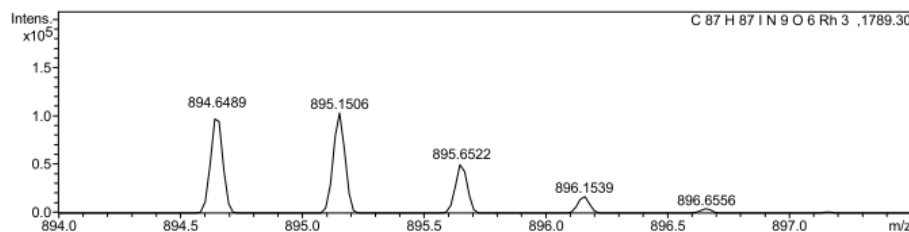

Figure S45 mass spectrum of compound [3-[Rh(COD)I]<sub>3</sub>]

## Mass Spectrum SmartFormula Report

### Analysis Info

Analysis Name D:\Data\Fish\MS20130308\_L2Rh\_pos\_wide000001.d  
 Method tune\_wide\_20130103.m  
 Sample Name TuningMix 1:100  
 Comment

Acquisition Date 3/8/2013 11:17:52 AM

Operator BDAL@DE  
 Instrument / Ser# micrOTOF-Q 10183

### Acquisition Parameter

|             |          |                       |           |                  |           |
|-------------|----------|-----------------------|-----------|------------------|-----------|
| Source Type | ESI      | Ion Polarity          | Positive  | Set Nebulizer    | 0.4 Bar   |
| Focus       | Active   | Set Capillary         | 4500 V    | Set Dry Heater   | 180 °C    |
| Scan Begin  | 50 m/z   | Set End Plate Offset  | -500 V    | Set Dry Gas      | 4.0 l/min |
| Scan End    | 3000 m/z | Set Collision Cell RF | 600.0 Vpp | Set Divert Valve | Source    |

### +MS, 0.8-0.8min #(46-49)

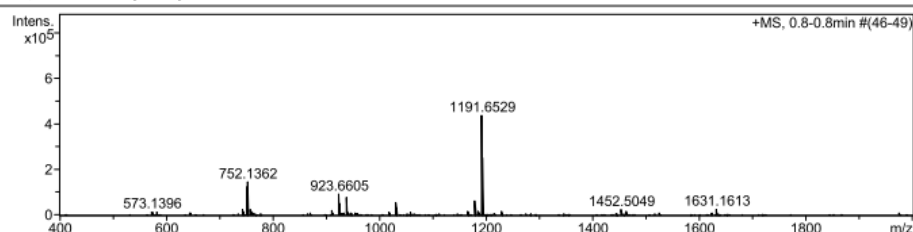

| Meas. m/z | # | Formula                       | Score  | m/z       | err [mDa] | err [ppm] | mSigma | rdb  | e <sup>-</sup> | Conf | N-Rule |
|-----------|---|-------------------------------|--------|-----------|-----------|-----------|--------|------|----------------|------|--------|
| 751.8009  | 1 | C 109 H 112 I N 12 O 8 Rh 4   | 100.00 | 751.7991  | -1.7      | -2.3      | 19.3   | 61.5 | even           | ok   | ok     |
| 1191.1505 | 1 | C 109 H 112 I 2 N 12 O 8 Rh 4 | 100.00 | 1191.1512 | 0.7       | 0.6       | 42.6   | 61.0 | even           | ok   | ok     |

### +MS, 0.8-0.8min #(46-49)

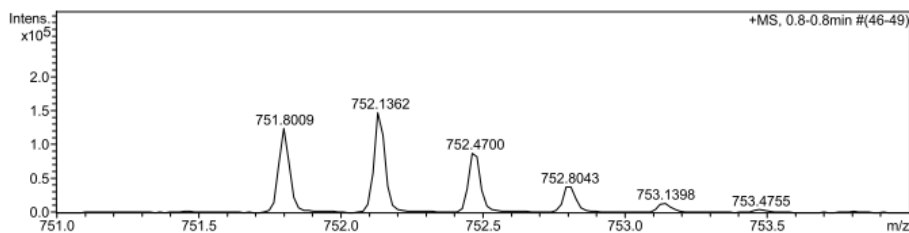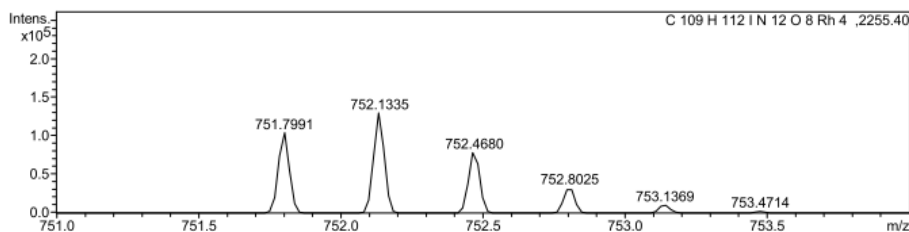

Figure S46 mass spectrum of compound [4-[Rh(COD)I]<sub>4</sub>]

## Crystal Data

**Table 1** Crystal data and structure refinement for ic 15835 (compound [2a][I]<sub>2</sub>).

|                                   |                                                                              |                  |
|-----------------------------------|------------------------------------------------------------------------------|------------------|
| Identification code               | ic15835                                                                      |                  |
| Empirical formula                 | C <sub>36</sub> H <sub>36</sub> I <sub>2</sub> N <sub>8</sub> O <sub>4</sub> |                  |
| Formula weight                    | 898.53                                                                       |                  |
| Temperature                       | 150(2) K                                                                     |                  |
| Wavelength                        | 0.71073 Å                                                                    |                  |
| Crystal system                    | Monoclinic                                                                   |                  |
| Space group                       | C2/c                                                                         |                  |
| Unit cell dimensions              | a = 21.0444(10) Å                                                            | α = 90°.         |
|                                   | b = 12.4275(5) Å                                                             | β = 114.665(2)°. |
|                                   | c = 15.2824(7) Å                                                             | γ = 90°.         |
| Volume                            | 3632.1(3) Å <sup>3</sup>                                                     |                  |
| Z                                 | 4                                                                            |                  |
| Density (calculated)              | 1.643 g/cm <sup>3</sup>                                                      |                  |
| Absorption coefficient            | 1.782 mm <sup>-1</sup>                                                       |                  |
| F(000)                            | 1784                                                                         |                  |
| Crystal size                      | 0.20 x 0.12 x 0.02 mm <sup>3</sup>                                           |                  |
| Theta range for data collection   | 1.95 to 25.00°.                                                              |                  |
| Index ranges                      | -23 ≤ h ≤ 24, -13 ≤ k ≤ 14, -18 ≤ l ≤ 18                                     |                  |
| Reflections collected             | 11333                                                                        |                  |
| Independent reflections           | 3201 [R(int) = 0.0566]                                                       |                  |
| Completeness to theta = 25.00°    | 99.9 %                                                                       |                  |
| Absorption correction             | Semi-empirical from equivalents                                              |                  |
| Max. and min. transmission        | 0.952 and 0.865                                                              |                  |
| Refinement method                 | Full-matrix least-squares on F <sup>2</sup>                                  |                  |
| Data / restraints / parameters    | 3201 / 0 / 229                                                               |                  |
| Goodness-of-fit on F <sup>2</sup> | 1.076                                                                        |                  |
| Final R indices [I > 2σ(I)]       | R1 = 0.0377, wR2 = 0.0802                                                    |                  |
| R indices (all data)              | R1 = 0.0659, wR2 = 0.0968                                                    |                  |
| Largest diff. peak and hole       | 0.605 and -0.788 e.Å <sup>-3</sup>                                           |                  |

**Table 2** Crystal data and structure refinement for ic16141 (compound [2a-(NiCpI)<sub>2</sub>])

|                                   |                                                                                                              |                    |
|-----------------------------------|--------------------------------------------------------------------------------------------------------------|--------------------|
| Identification code               | ic16141                                                                                                      |                    |
| Empirical formula                 | C <sub>44</sub> H <sub>40</sub> Cl <sub>6</sub> I <sub>2</sub> N <sub>6</sub> Ni <sub>2</sub> O <sub>4</sub> |                    |
| Formula weight                    | 1300.74                                                                                                      |                    |
| Temperature                       | 150(2) K                                                                                                     |                    |
| Wavelength                        | 0.71073 Å                                                                                                    |                    |
| Crystal system                    | Monoclinic                                                                                                   |                    |
| Space group                       | P2(1)/c                                                                                                      |                    |
| Unit cell dimensions              | a = 9.0998(3) Å                                                                                              | α = 90°.           |
|                                   | b = 24.2692(7) Å                                                                                             | β = 109.2740(13)°. |
|                                   | c = 11.5148(4) Å                                                                                             | γ = 90°.           |
| Volume                            | 2400.45(13) Å <sup>3</sup>                                                                                   |                    |
| Z                                 | 2                                                                                                            |                    |
| Density (calculated)              | 1.800 g/cm <sup>3</sup>                                                                                      |                    |
| Absorption coefficient            | 2.453 mm <sup>-1</sup>                                                                                       |                    |
| F(000)                            | 1284                                                                                                         |                    |
| Crystal size                      | 0.20 x 0.12 x 0.02 mm <sup>3</sup>                                                                           |                    |
| Theta range for data collection   | 1.68 to 25.00°.                                                                                              |                    |
| Index ranges                      | -10 ≤ h ≤ 10, -24 ≤ k ≤ 28, -13 ≤ l ≤ 13                                                                     |                    |
| Reflections collected             | 12336                                                                                                        |                    |
| Independent reflections           | 4218 [R(int) = 0.0562]                                                                                       |                    |
| Completeness to theta = 25.00°    | 99.9 %                                                                                                       |                    |
| Absorption correction             | Semi-empirical from equivalents                                                                              |                    |
| Max. and min. transmission        | 0.940 and 0.674                                                                                              |                    |
| Refinement method                 | Full-matrix least-squares on F <sup>2</sup>                                                                  |                    |
| Data / restraints / parameters    | 4218 / 15 / 288                                                                                              |                    |
| Goodness-of-fit on F <sup>2</sup> | 1.333                                                                                                        |                    |
| Final R indices [I > 2σ(I)]       | R1 = 0.1254, wR2 = 0.3282                                                                                    |                    |
| R indices (all data)              | R1 = 0.1690, wR2 = 0.3470                                                                                    |                    |
| Largest diff. peak and hole       | 2.986 and -2.686 e.Å <sup>-3</sup>                                                                           |                    |

**Table 3** Crystal data and structure refinement for ic 16325 (compound [5][I]).

|                                   |                                             |                              |
|-----------------------------------|---------------------------------------------|------------------------------|
| Identification code               | ic16325                                     |                              |
| Empirical formula                 | C19 H18 I N3 O2                             |                              |
| Formula weight                    | 447.26                                      |                              |
| Temperature                       | 150(2) K                                    |                              |
| Wavelength                        | 0.71073 Å                                   |                              |
| Crystal system                    | Monoclinic                                  |                              |
| Space group                       | P2(1)/c                                     |                              |
| Unit cell dimensions              | a = 14.4332(10) Å                           | $\alpha = 90^\circ$ .        |
|                                   | b = 8.5362(6) Å                             | $\beta = 100.356(2)^\circ$ . |
|                                   | c = 15.4137(11) Å                           | $\gamma = 90^\circ$ .        |
| Volume                            | 1868.1(2) Å <sup>3</sup>                    |                              |
| Z                                 | 4                                           |                              |
| Density (calculated)              | 1.590 Mg/m <sup>3</sup>                     |                              |
| Absorption coefficient            | 1.731 mm <sup>-1</sup>                      |                              |
| F(000)                            | 888                                         |                              |
| Crystal size                      | 0.25 x 0.25 x 0.13 mm <sup>3</sup>          |                              |
| Theta range for data collection   | 1.43 to 27.50°.                             |                              |
| Index ranges                      | -18 ≤ h ≤ 16, -11 ≤ k ≤ 11, -17 ≤ l ≤ 20    |                              |
| Reflections collected             | 13991                                       |                              |
| Independent reflections           | 4273 [R(int) = 0.0357]                      |                              |
| Completeness to theta = 27.50°    | 100.0 %                                     |                              |
| Absorption correction             | Semi-empirical from equivalents             |                              |
| Max. and min. transmission        | 0.8063 and 0.6715                           |                              |
| Refinement method                 | Full-matrix least-squares on F <sup>2</sup> |                              |
| Data / restraints / parameters    | 4273 / 0 / 228                              |                              |
| Goodness-of-fit on F <sup>2</sup> | 1.216                                       |                              |
| Final R indices [I > 2sigma(I)]   | R1 = 0.0396, wR2 = 0.0955                   |                              |
| R indices (all data)              | R1 = 0.0473, wR2 = 0.1068                   |                              |
| Largest diff. peak and hole       | 1.229 and -0.948 e.Å <sup>-3</sup>          |                              |

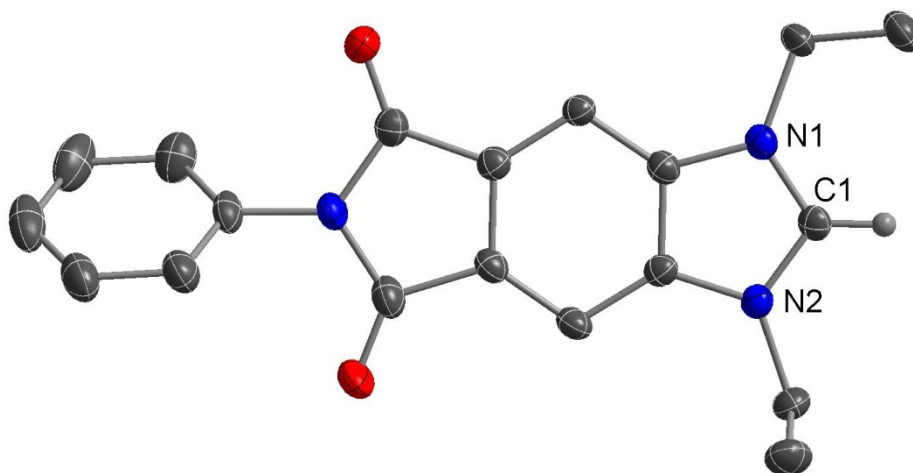

Figure S47. Molecular structure of [5][I]. Thermal ellipsoids were set at the 50% probability level and hydrogen atoms were omitted for clarity.
